# Supplementary material for: Water abstraction affects abundance, size-structure and growth of two threatened cyprinid fishes
Source: PLoS One. 2017 Apr 17;12(4):e0175932. doi: 10.1371/journal.pone.0175932 (PMC5393870; doi:10.1371/journal.pone.0175932)
Supplement: S2 Table — (XLSX) [file pone.0175932.s002.xlsx]

## Sheet: Scale radii data
Species	Site	Date	Fork_length_(mm)	Total_weight_(g)	Age_(years)	Scale_radius_year_1_(screen_mm)	Scale_radius_year_2_(screen_mm)	Scale_radius_year_3_(screen_mm)	Scale_radius_year_4_(screen_mm)	Scale_radius_year_5_(screen_mm)	Scale_radius_year_6_(screen_mm)	Scale_radius_year_7_(screen_mm)	Scale_radius_year_8_(screen_mm)	Scale_radius_year_9_(screen_mm)	total_radius_(screen_mm)	Scale_radius_year_1_(real_mm)	Scale_radius_year_2_(real_mm)	Scale_radius_year_3_(real_mm)	Scale_radius_year_4_(real_mm)	Scale_radius_year_5_(real_mm)	Scale_radius_year_6_(real_mm)	Scale_radius_year_7_(real_mm)	Scale_radius_year_8_(real_mm)	Scale_radius_year_9_(real_mm)	total_radius_(real_mm)
Barbus meridionalis	T1	14-May-2012	78	9.8	3	7	12	15	20						20	0.2596	0.3991	0.4828	0.6223						0.6223
Barbus meridionalis	T1	14-May-2012	144	40.1	5	11	19	25	30	36	42				42	0.3712	0.5944	0.7618	0.9013	1.0687	1.2361				1.2361
Barbus meridionalis	T1	14-May-2012	127	30.2	4	10	18	24	30	34					34	0.3433	0.5665	0.7339	0.9013	1.0129					1.0129
Barbus meridionalis	T1	14-May-2012	104	18.6	3	15	29	31	35						35	0.4828	0.8734	0.9292	1.0408						1.0408
Barbus meridionalis	T1	14-May-2012	147	54.1	4	12	27	35	43	47					47	0.3991	0.8176	1.0408	1.264	1.3756					1.3756
Barbus meridionalis	T1	14-May-2012	104	15.4	4	14	20	28	32	35					35	0.4549	0.6223	0.8455	0.9571	1.0408					10408
Barbus meridionalis	T1	14-May-2012	104	16.1	3	11	21	26	29						29	0.3712	0.6502	0.7897	0.8734						0.8734
Barbus meridionalis	T1	14-May-2012	89	10.3	3	8	19	27	30						30	0.2875	0.5944	0.8176	0.9013						0.9013
Barbus meridionalis	T1	14-May-2012	137	40.3	4	14	20	31	34	46					46	0.4549	0.6223	0.9292	1.0129	1.3477					1.3477
Barbus meridionalis	T1	14-May-2012	121	25	3	13	28	36	47						47	0.427	0.8455	1.0687	1.3756						1.3756
Barbus meridionalis	T1	14-May-2012	116	23	4	8	15	38	48	51					51	0.2875	0.4828	1.1245	1.4035	1.4872					1.4872
Barbus meridionalis	T1	14-May-2012	110	19.6	4	9	20	28	37	41					41	0.3154	0.6223	0.8455	1.0966	1.2082					1.2082
Barbus meridionalis	T1	14-May-2012	75	6.3	2	9	15	16							16	0.3154	0.4828	0.5107							0.5107
Barbus meridionalis	T1	14-May-2012	78	7.6	2	8	19	27							27	0.2875	0.5944	0.8176							0.8176
Barbus meridionalis	T1	14-May-2012	76	6.4	2	11	15	19							19	0.3712	0.4828	0.5944							0.5944
Barbus meridionalis	T1	14-May-2012	97	13.5	3	6	14	20	22						22	0.2317	0.4549	0.6223	0.6781						0.6781
Barbus meridionalis	T1	14-May-2012	86	9.3	2	9	25	30							30	0.3154	0.7618	0.9013							0.9013
Barbus meridionalis	T1	14-May-2012	116	22.3	3	13	23	30	32						32	0.427	0.706	0.9013	0.9571						0.9571
Barbus meridionalis	T1	14-May-2012	88	8.9	2	9	17	32							32	0.3154	0.5386	0.9571							0.9571
Barbus meridionalis	T1	14-May-2012	77	7.3	2	7	11	18							18	0.2596	0.3712	0.5665							0.5665
Barbus meridionalis	T1	14-May-2012	77	6.9	2	9	17	22							22	0.3154	0.5386	0.6781							0.6781
Barbus meridionalis	T2	30-May-2012	104	20.7	3	10	15	29	35						35	0.3433	0.4828	0.8734	1.0408						1.0408
Barbus meridionalis	T2	30-May-2012	85	10.4	3	12	25	37	41						41	0.3991	0.7618	1.0966	1.2082						1.2082
Barbus meridionalis	T2	30-May-2012	75	6.6	3	8	13	20	25						25	0.2875	0.427	0.6223	0.7618						0.7618
Barbus meridionalis	T2	30-May-2012	82	8.6	3	7	14	20	25						25	0.2596	0.4549	0.6223	0.7618						0.7618
Barbus meridionalis	T2	30-May-2012	74	10.8	3	7	20	31	35						35	0.2596	0.6223	0.9292	1.0408						1.0408
Barbus meridionalis	T2	30-May-2012	95	14.5	4	7	15	25	30	34					34	0.2596	0.4828	0.7618	0.9013	1.0129					1.0129
Barbus meridionalis	T2	30-May-2012	86	9	2	9	17	28							28	0.3154	0.5386	0.8455							0.8455
Barbus meridionalis	T3	30-May-2012	78	8.6	3	5	12	21	24						24	0.2038	0.3991	0.6502	0.7339						0.7339
Barbus meridionalis	T3	30-May-2012	83	10.3	3	7	19	25	27						27	0.2596	0.5944	0.7618	0.8176						0.8176
Barbus meridionalis	T3	30-May-2012	85	10.8	3	7	12	17	20						20	0.2596	0.3991	0.5386	0.6223						0.6223
Barbus meridionalis	T3	30-May-2012	80	9	2	9	18	20							20	0.3154	0.5665	0.6223							0.6223
Barbus meridionalis	T3	30-May-2012	78	7.1	2	8	12	15							15	0.2875	0.3991	0.4828							0.4828
Barbus meridionalis	T3	30-May-2012	80	7.2	2	7	14	23							23	0.2596	0.4549	0.706							0.706
Barbus meridionalis	T3	30-May-2012	78	8.2	2	6	14	21							21	0.2317	0.4549	0.6502							0.6502
Barbus meridionalis	T3	30-May-2012	78	8.2	3	7	11	18	22						22	0.2596	0.3712	0.5665	0.6781						0.6781
Barbus meridionalis	T3	30-May-2012	98	15.1	5	5	11	17	27	30	32				32	0.2038	0.3712	0.5386	0.8176	0.9013	0.9571				0.9571
Barbus meridionalis	T3	30-May-2012	78	7.2	2	5	11	21							21	0.2038	0.3712	0.6502							0.6502
Barbus meridionalis	T3	30-May-2012	77	7.1	2	8	14	18							18	0.2875	0.4549	0.5665							0.5665
Barbus meridionalis	T3	30-May-2012	147	57.3	2	14	26	50							50	0.4549	0.7897	1.4593							1.4593
Barbus meridionalis	T4	11-May-2012	87	11.5	2	16	24	27							27	0.5107	0.7339	0.8176							0.8176
Barbus meridionalis	T4	11-May-2012	87	10.5	3	8	20	28	32						32	0.2875	0.6223	0.8455	0.9571						0.9571
Barbus meridionalis	T4	11-May-2012	86	10.3	2	12	25	29							29	0.3991	0.7618	0.8734							0.8734
Barbus meridionalis	T4	11-May-2012	76	7.5	2	6	16	20							20	0.2317	0.5107	0.6223							0.6223
Barbus meridionalis	T4	11-May-2012	77	8.2	2	7	15	22							22	0.2596	0.4828	0.6781							0.6781
Barbus meridionalis	T4	11-May-2012	99	13.9	3	15	20	25	30						30	0.4828	0.6223	0.7618	0.9013						0.9013
Barbus meridionalis	T4	11-May-2012	95	14.4	2	15	22	26							26	0.4828	0.6781	0.7897							0.7897
Barbus meridionalis	T4	11-May-2012	75	8	2	7	16	24							24	0.2596	0.5107	0.7339							0.7339
Barbus meridionalis	T4	11-May-2012	124	34.5	3	16	30	41	43						43	0.5107	0.9013	1.2082	1.264						1.264
Barbus meridionalis	T4	11-May-2012	97	14.1	2	15	25	29							29	0.4828	0.7618	0.8734							0.8734
Barbus meridionalis	T4	11-May-2012	109	26.7	2	10	20	38							38	0.3433	0.6223	1.1245							1.1245
Barbus meridionalis	T4	11-May-2012	142	43.1	5	12	25	30	35	38	42				42	0.3991	0.7618	0.9013	1.0408	1.1245	1.2361				1.2361
Barbus meridionalis	T4	11-May-2012	139	57.1	3	17	33	37	45						45	0.5386	0.985	1.0966	1.3198						1.3198
Barbus meridionalis	T4	11-May-2012	102	22.7	2	9	16	25							25	0.3154	0.5107	0.7618							0.7618
Barbus meridionalis	T4	11-May-2012	93	14.2	3	17	26	31	33						33	0.5386	0.7897	0.9292	0.985						0.985
Barbus meridionalis	T4	11-May-2012	107	23.2	3	11	22	38	39						39	0.3712	0.6781	1.1245	1.1524						1.1524
Barbus meridionalis	T4	11-May-2012	91	13	2	16	25	30							30	0.5107	0.7618	0.9013							0.9013
Barbus meridionalis	T4	11-May-2012	101	15.6	2	15	23	26							26	0.4828	0.706	0.7897							0.7897
Barbus meridionalis	T4	11-May-2012	91	12.8	3	7	17	22	25						25	0.2596	0.5386	0.6781	0.7618						0.7618
Barbus meridionalis	T4	11-May-2012	84	8.4	2	8	18	27							27	0.2875	0.5665	0.8176							0.8176
Barbus meridionalis	T4	11-May-2012	73	6.8	2	7	23	25							25	0.2596	0.706	0.7618							0.7618
Barbus meridionalis	T4	11-May-2012	88	10.3	2	12	21	25							25	0.3991	0.6502	0.7618							0.7618
Barbus meridionalis	T4	11-May-2012	97	16.7	3	8	17	32	34						34	0.2875	0.5386	0.9571	1.0129						1.0129
Barbus meridionalis	T4	11-May-2012	80	7.4	1	12	22								22	0.3991	0.6781								0.6781
Barbus meridionalis	T4	11-May-2012	77	8.3	1	10	21								21	0.3433	0.6502								0.6502
Barbus meridionalis	T4	11-May-2012	84	9.1	2	12	21	24							24	0.3991	0.6502	0.7339							0.7339
Barbus meridionalis	T4	11-May-2012	86	11.3	2	7	14	30							30	0.2596	0.4549	0.9013							0.9013
Barbus meridionalis	T4	11-May-2012	86	9.6	3	8	18	25	28						28	0.2875	0.5665	0.7618	0.8455						0.8455
Barbus meridionalis	T4	11-May-2012	77	7.8	2	9	19	23							23	0.3154	0.5944	0.706							0.706
Barbus meridionalis	T4	11-May-2012	142	59.4	3	15	36	42	50						50	0.4828	1.0687	1.2361	1.4593						1.4593
Barbus meridionalis	T4	11-May-2012	95	14.6	3	8	19	30	33						33	0.2875	0.5944	0.9013	0.985						0.985
Barbus meridionalis	T4	11-May-2012	99	15.8	3	11	17	25	29						29	0.3712	0.5386	0.7618	0.8734						0.8734
Barbus meridionalis	T4	11-May-2012	84	10.9	3	10	16	23	27						27	0.3433	0.5107	0.706	0.8176						0.8176
Barbus meridionalis	T4	11-May-2012	92	12.3	3	7	16	25	29						29	0.2596	0.5107	0.7618	0.8734						0.8734
Barbus meridionalis	T4	11-May-2012	99	21.6	3	9	15	25	29						29	0.3154	0.4828	0.7618	0.8734						0.8734
Barbus meridionalis	T4	11-May-2012	124	26.8	5	8	18	25	29	34	36				36	0.2875	0.5665	0.7618	0.8734	1.0129	1.0687				1.0687
Barbus meridionalis	T4	11-May-2012	121	26.6	4	8	16	24	30	35					35	0.2875	0.5107	0.7339	0.9013	1.0408					1.0408
Barbus meridionalis	T4	11-May-2012	96	15.4	3	9	15	25	27						27	0.3154	0.4828	0.7618	0.8176						0.8176
Barbus meridionalis	T4	11-May-2012	130	31.3	4	8	19	29	35	43					43	0.2875	0.5944	0.8734	1.0408	1.264					1.264
Barbus meridionalis	T4	11-May-2012	152	68.9	3	13	26	44	49						49	0.427	0.7897	1.2919	1.4314						1.4314
Barbus meridionalis	T4	11-May-2012	142	56.1	4	5	11	21	41	43					43	0.2038	0.3712	0.6502	1.2082	1.264					1.264
Barbus meridionalis	T4	11-May-2012	84	9.2	2	11	16	19							19	0.3712	0.5107	0.5944							0.5944
Barbus meridionalis	T4	11-May-2012	84	10.7	2	9	24	25							25	0.3154	0.7339	0.7618							0.7618
Barbus meridionalis	T4	11-May-2012	72	8.2	2	9	14	17							17	0.3154	0.4549	0.5386							0.5386
Barbus meridionalis	T4	11-May-2012	81	8.7	3	13	19	23	25						25	0.427	0.5944	0.706	0.7618						0.7618
Barbus meridionalis	T4	11-May-2012	91	16.1	3	8	13	21	25						25	0.2875	0.427	0.6502	0.7618						0.7618
Barbus meridionalis	T4	11-May-2012	83	9.8	4	7	14	21	24	26					26	0.2596	0.4549	0.6502	0.7339	0.7897					0.7897
Barbus meridionalis	T4	11-May-2012	121	30.3	4	8	19	24	29	32					32	0.2875	0.5944	0.7339	0.8734	0.9571					0.9571
Barbus meridionalis	T4	11-May-2012	134	41.9	3	9	16	30	47						47	0.3154	0.5107	0.9013	1.3756						1.3756
Barbus meridionalis	T4	11-May-2012	109	30.7	2	13	25	27							27	0.427	0.7618	0.8176							0.8176
Barbus meridionalis	T4	11-May-2012	105	18.2	3	14	20	33	35						35	0.4549	0.6223	0.985	1.0408						1.0408
Barbus meridionalis	T4	11-May-2012	88	12.1	3	6	14	26	29						29	0.2317	0.4549	0.7897	0.8734						0.8734
Barbus meridionalis	T4	11-May-2012	91	12.4	3	6	14	26	30						30	0.2317	0.4549	0.7897	0.9013						0.9013
Barbus meridionalis	T4	11-May-2012	88	12.3	3	5	11	20	22						22	0.2038	0.3712	0.6223	0.6781						0.6781
Barbus meridionalis	T4	30-May-2012	153	57.3	3	12	22	30	49						49	0.3991	0.6781	0.9013	1.4314						1.4314
Barbus meridionalis	T4	30-May-2012	148	55.3	3	14	34	42	46						46	0.4549	1.0129	1.2361	1.3477						1.3477
Barbus meridionalis	T4	30-May-2012	105	22	3	8	14	24	27						27	0.2875	0.4549	0.7339	0.8176						0.8176
Barbus meridionalis	T4	30-May-2012	113	27.3	3	8	18	31	37						37	0.2875	0.5665	0.9292	1.0966						1.0966
Barbus meridionalis	T4	30-May-2012	87	10.5	3	7	15	20	23						23	0.2596	0.4828	0.6223	0.706						0.706
Barbus meridionalis	T4	30-May-2012	121	32.7	3	12	23	34	35						35	0.3991	0.706	1.0129	1.0408						1.0408
Barbus meridionalis	T4	30-May-2012	143	52.6	2	13	32	50							50	0.427	0.9571	1.4593							1.4593
Barbus meridionalis	T4	30-May-2012	92	12.3	3	6	12	25	27						27	0.2317	0.3991	0.7618	0.8176						0.8176
Barbus meridionalis	T4	30-May-2012	132	44.6	3	13	29	39	41						41	0.427	0.8734	1.1524	1.2082						1.2082
Barbus meridionalis	T4	30-May-2012	135	43.8	3	15	22	38	40						40	0.4828	0.6781	1.1245	1.1803						1.1803
Barbus meridionalis	T4	30-May-2012	93	14.2	2	14	24	27							27	0.4549	0.7339	0.8176							0.8176
Barbus meridionalis	T4	30-May-2012	97	14	3	8	15	25	30						30	0.2875	0.4828	0.7618	0.9013						0.9013
Barbus meridionalis	T4	30-May-2012	93	12.2	2	15	22	26							26	0.4828	0.6781	0.7897							0.7897
Barbus meridionalis	T4	30-May-2012	82	7.7	2	9	19	26							26	0.3154	0.5944	0.7897							0.7897
Barbus meridionalis	T4	30-May-2012	90	11.7	2	10	19	23							23	0.3433	0.5944	0.706							0.706
Barbus meridionalis	T5	29-May-2012	133	32.8	4	12	20	30	35	37					37	0.3991	0.6223	0.9013	1.0408	1.0966					1.0966
Barbus meridionalis	T5	29-May-2012	136	43.7	4	5	12	18	40	42					42	0.2038	0.3991	0.5665	1.1803	1.2361					1.2361
Barbus meridionalis	T5	29-May-2012	101	18.8	4	6	11	21	25	31					31	0.2317	0.3712	0.6502	0.7618	0.9292					0.9292
Barbus meridionalis	T5	29-May-2012	102	16.1	2	10	20	26							26	0.3433	0.6223	0.7897							0.7897
Barbus meridionalis	T5	29-May-2012	83	8.8	3	9	18	26	30						30	0.3154	0.5665	0.7897	0.9013						0.9013
Barbus meridionalis	T5	29-May-2012	85	8.7	2	7	19	22							22	0.2596	0.5944	0.6781							0.6781
Barbus meridionalis	T6	10-May-2012	173	92.6	4	21	36	50	65	66					66	0.6502	1.0687	1.4593	1.8778	1.9057					1.9057
Barbus meridionalis	T6	10-May-2012	105	23.1	3	14	25	30	32						32	0.4549	0.7618	0.9013	0.9571						0.9571
Barbus meridionalis	T6	10-May-2012	91	14.8	3	11	20	30	33						33	0.3712	0.6223	0.9013	0.985						0.985
Barbus meridionalis	T6	10-May-2012	109	20.6	2	13	30	35							35	0.427	0.9013	1.0408							1.0408
Barbus meridionalis	T6	10-May-2012	103	17.6	4	12	20	30	34	38					38	0.3991	0.6223	0.9013	1.0129	1.1245					1.1245
Barbus meridionalis	T6	10-May-2012	94	16.1	2	17	21	26							26	0.5386	0.6502	0.7897							0.7897
Barbus meridionalis	T6	10-May-2012	79	7.9	2	13	19	22							22	0.427	0.5944	0.6781							0.6781
Barbus meridionalis	T6	10-May-2012	83	8.9	2	10	15	18							18	0.3433	0.4828	0.5665							0.5665
Barbus meridionalis	T6	10-May-2012	87	11.7	2	14	22	25							25	0.4549	0.6781	0.7618							0.7618
Barbus meridionalis	T6	10-May-2012	71	6.2	2	18	24	28							28	0.5665	0.7339	0.8455							0.8455
Barbus meridionalis	T6	10-May-2012	87	10.7	3	13	20	27	28						28	0.427	0.6223	0.8176	0.8455						0.8455
Barbus meridionalis	T6	10-May-2012	82	9	2	13	22	29							29	0.427	0.6781	0.8734							0.8734
Barbus meridionalis	T6	10-May-2012	78	7	2	9	15	19							19	0.3154	0.4828	0.5944							0.5944
Barbus meridionalis	T6	10-May-2012	82	9.8	2	13	26	28							28	0.427	0.7897	0.8455							0.8455
Barbus meridionalis	T6	10-May-2012	75	6.5	2	14	19	21							21	0.4549	0.5944	0.6502							0.6502
Barbus meridionalis	T6	10-May-2012	75	7.8	2	11	18	20							20	0.3712	0.5665	0.6223							0.6223
Barbus meridionalis	T6	10-May-2012	80	6.2	2	18	26	31							31	0.5665	0.7897	0.9292							0.9292
Barbus meridionalis	T6	10-May-2012	72	5.9	2	11	19	23							23	0.3712	0.5944	0.706							0.706
Barbus meridionalis	T6	10-May-2012	114	32.2	2	14	38	44							44	0.4549	1.1245	1.2919							1.2919
Barbus meridionalis	T6	10-May-2012	94	12.7	2	29	38	38							38	0.8734	1.1245	1.1245							1.1245
Barbus meridionalis	T6	10-May-2012	79	9	3	14	22	28	29						29	0.4549	0.6781	0.8455	0.8734						0.8734
Barbus meridionalis	T6	10-May-2012	91	13.4	2	17	32	33							33	0.5386	0.9571	0.985							0.985
Barbus meridionalis	T6	10-May-2012	92	13.3	2	16	23	30							30	0.5107	0.706	0.9013							0.9013
Barbus meridionalis	T6	10-May-2012	84	9.6	2	16	24	32							32	0.5107	0.7339	0.9571							0.9571
Barbus meridionalis	T6	10-May-2012	80	10.3	2	10	19	20							20	0.3433	0.5944	0.6223							0.6223
Barbus meridionalis	T6	10-May-2012	70	6.9	3	10	18	22	25						25	0.3433	0.5665	0.6781	0.7618						0.7618
Barbus meridionalis	T6	10-May-2012	86	9.9	3	13	20	24	26						26	0.427	0.6223	0.7339	0.7897						0.7897
Barbus meridionalis	T6	10-May-2012	77	8.3	3	13	18	22	25						25	0.427	0.5665	0.6781	0.7618						0.7618
Barbus meridionalis	T6	10-May-2012	76	8.4	3	15	24	30	32						32	0.4828	0.7339	0.9013	0.9571						0.9571
Barbus meridionalis	T6	10-May-2012	85	9.4	3	8	16	21	23						23	0.2875	0.5107	0.6502	0.706						0.706
Barbus meridionalis	T6	10-May-2012	76	6.5	2	15	24	29							29	0.4828	0.7339	0.8734							0.8734
Barbus meridionalis	T6	10-May-2012	87	10.5	2	23	32	38							38	0.706	0.9571	1.1245							1.1245
Barbus meridionalis	T6	10-May-2012	76	7.9	2	12	20	22							22	0.3991	0.6223	0.6781							0.6781
Barbus meridionalis	T6	10-May-2012	72	6.1	2	10	18	22							22	0.3433	0.5665	0.6781							0.6781
Barbus meridionalis	T6	10-May-2012	74	7	2	10	23	26							26	0.3433	0.706	0.7897							0.7897
Barbus meridionalis	T6	10-May-2012	84	9.9	2	14	26	30							30	0.4549	0.7897	0.9013							0.9013
Barbus meridionalis	T6	10-May-2012	71	6.3	2	11	18	21							21	0.3712	0.5665	0.6502							0.6502
Barbus meridionalis	T6	10-May-2012	83	8	2	11	22	26							26	0.3712	0.6781	0.7897							0.7897
Barbus meridionalis	T6	10-May-2012	69	5.3	2	10	21	25							25	0.3433	0.6502	0.7618							0.7618
Barbus meridionalis	T6	10-May-2012	78	7.3	2	12	21	29							29	0.3991	0.6502	0.8734							0.8734
Barbus meridionalis	T6	10-May-2012	99	19	3	15	28	34	37						37	0.4828	0.8455	1.0129	1.0966						1.0966
Barbus meridionalis	T6	10-May-2012	118	25.6	4	11	22	31	40	43					43	0.3712	0.6781	0.9292	1.1803	1.264					1.264
Barbus meridionalis	T6	10-May-2012	91	14.7	2	15	28	34							34	0.4828	0.8455	1.0129							1.0129
Barbus meridionalis	T6	10-May-2012	90	12.4	2	13	23	26							26	0.427	0.706	0.7897							0.7897
Barbus meridionalis	T6	10-May-2012	96	15.4	3	15	23	29	30						30	0.4828	0.706	0.8734	0.9013						0.9013
Barbus meridionalis	T6	10-May-2012	77	7.9	3	14	24	32	33						33	0.4549	0.7339	0.9571	0.985						0.985
Barbus meridionalis	T6	10-May-2012	86	11.2	2	13	22	25							25	0.427	0.6781	0.7618							0.7618
Barbus meridionalis	T6	10-May-2012	82	9.4	3	15	22	28	30						30	0.4828	0.6781	0.8455	0.9013						0.9013
Barbus meridionalis	T6	10-May-2012	75	7.5	2	10	17	19							19	0.3433	0.5386	0.5944							0.5944
Barbus meridionalis	T6	10-May-2012	74	7	2	10	17	20							20	0.3433	0.5386	0.6223							0.6223
Barbus meridionalis	T6	10-May-2012	74	6.7	3	12	20	23	25						25	0.3991	0.6223	0.706	0.7618						0.7618
Barbus meridionalis	T6	10-May-2012	72	6	2	9	24	27							27	0.3154	0.7339	0.8176							0.8176
Barbus meridionalis	T6	10-May-2012	78	8.1	2	10	24	27							27	0.3433	0.7339	0.8176							0.8176
Barbus meridionalis	T6	10-May-2012	71	6.3	2	11	17	21							21	0.3712	0.5386	0.6502							0.6502
Barbus meridionalis	T6	10-May-2012	67	4.8	1	10	17								17	0.3433	0.5386								0.5386
Barbus meridionalis	T6	10-May-2012	74	6.7	1	11	21								21	0.3712	0.6502								0.6502
Barbus meridionalis	T6	10-May-2012	68	6.6	2	9	16	18							18	0.3154	0.5107	0.5665							0.5665
Barbus meridionalis	T6	28-May-2012	77	7.4	2	15	25	30							30	0.4828	0.7618	0.9013							0.9013
Barbus meridionalis	T6	28-May-2012	71	6.7	2	10	18	21							21	0.3433	0.5665	0.6502							0.6502
Barbus meridionalis	T6	28-May-2012	86	11	3	10	15	22	25						25	0.3433	0.4828	0.6781	0.7618						0.7618
Barbus meridionalis	T6	28-May-2012	80	8.4	3	7	12	17	19						19	0.2596	0.3991	0.5386	0.5944						0.5944
Barbus meridionalis	T6	28-May-2012	78	6.4	2	9	21	23							23	0.3154	0.6502	0.706							0.706
Barbus meridionalis	T6	28-May-2012	81	7.8	2	8	17	20							20	0.2875	0.5386	0.6223							0.6223
Barbus meridionalis	T6	28-May-2012	83	8.4	2	15	21	28							28	0.4828	0.6502	0.8455							0.8455
Barbus meridionalis	T6	28-May-2012	89	6.9	2	12	22	24							24	0.3991	0.6781	0.7339							0.7339
Barbus meridionalis	T6	28-May-2012	73	6.3	2	10	21	24							24	0.3433	0.6502	0.7339							0.7339
Barbus meridionalis	T6	28-May-2012	75	6.4	2	8	21	25							25	0.2875	0.6502	0.7618							0.7618
Barbus meridionalis	T6	28-May-2012	70	5.2	2	7	13	16							16	0.2596	0.427	0.5107							0.5107
Barbus meridionalis	T6	28-May-2012	97	15.5	2	10	19	25							25	0.3433	0.5944	0.7618							0.7618
Barbus meridionalis	T6	28-May-2012	106	17.2	2	8	27	31							31	0.2875	0.8176	0.9292							0.9292
Barbus meridionalis	T6	28-May-2012	83	9.1	2	16	24	26							26	0.5107	0.7339	0.7897							0.7897
Barbus meridionalis	T7	28-May-2012	123	25.7	4	8	23	29	36	40					40	0.2875	0.706	0.8734	1.0687	1.1803					1.1803
Barbus meridionalis	T7	28-May-2012	79	7.2	2	9	16	18							18	0.3154	0.5107	0.5665							0.5665
Barbus meridionalis	T7	28-May-2012	96	16.8	2	8	22	29							29	0.2875	0.6781	0.8734							0.8734
Barbus meridionalis	T7	28-May-2012	93	14.3	2	8	24	32							32	0.2875	0.7339	0.9571							0.9571
Barbus meridionalis	T7	28-May-2012	154	61	5	15	26	38	45	52	54				54	0.4828	0.7897	1.1245	1.3198	1.5151	1.5709				1.5709
Barbus meridionalis	T7	28-May-2012	175	90.6	4	18	26	39	50	59					59	0.5665	0.7897	1.1524	1.4593	1.7104					1.7104
Barbus meridionalis	T7	28-May-2012	153	60.8	3	16	31	49	50						50	0.5107	0.9292	1.4314	1.4593						1.4593
Barbus meridionalis	T7	28-May-2012	157	57.4	2	11	35	46							46	0.3712	1.0408	1.3477							1.3477
Barbus meridionalis	T7	28-May-2012	117	27.9	3	12	18	26	29						29	0.3991	0.5665	0.7897	0.8734						0.8734
Barbus meridionalis	T7	28-May-2012	91	16.9	2	11	24	32							32	0.3712	0.7339	0.9571							0.9571
Barbus meridionalis	T7	28-May-2012	98	17.3	2	15	21	27							27	0.4828	0.6502	0.8176							0.8176
Barbus meridionalis	T7	28-May-2012	77	8.6	2	10	21	23							23	0.3433	0.6502	0.706							0.706
Barbus meridionalis	T7	28-May-2012	95	13.2	3	22	27	30	32						32	0.6781	0.8176	0.9013	0.9571						0.9571
Barbus meridionalis	T7	28-May-2012	83	9.2	2	6	17	22							22	0.2317	0.5386	0.6781							0.6781
Barbus meridionalis	T7	28-May-2012	83	10	3	9	15	23	24						24	0.3154	0.4828	0.706	0.7339						0.7339
Barbus meridionalis	T7	28-May-2012	86	11	3	7	13	19	25						25	0.2596	0.427	0.5944	0.7618						0.7618
Barbus meridionalis	T7	28-May-2012	82	9.9	2	9	21	28							28	0.3154	0.6502	0.8455							0.8455
Barbus meridionalis	T7	28-May-2012	76	7.5	2	7	18	25							25	0.2596	0.5665	0.7618							0.7618
Barbus meridionalis	T7	28-May-2012	76	7.6	2	9	16	22							22	0.3154	0.5107	0.6781							0.6781
Barbus meridionalis	T7	28-May-2012	74	7.6	2	8	16	17							17	0.2875	0.5107	0.5386							0.5386
Barbus meridionalis	T7	28-May-2012	81	7.8	2	10	20	24							24	0.3433	0.6223	0.7339							0.7339
Barbus meridionalis	T7	28-May-2012	78	7.2	2	6	16	22							22	0.2317	0.5107	0.6781							0.6781
Barbus meridionalis	T7	28-May-2012	93	12.5	2	9	22	26							26	0.3154	0.6781	0.7897							0.7897
Barbus meridionalis	T7	28-May-2012	73	7.1	2	9	19	25							25	0.3154	0.5944	0.7618							0.7618
Barbus meridionalis	T7	28-May-2012	80	9.2	2	9	22	24							24	0.3154	0.6781	0.7339							0.7339
Barbus meridionalis	T7	28-May-2012	72	5.9	1	13	17								17	0.427	0.5386								0.5386
Barbus meridionalis	T7	28-May-2012	89	16.4	3	10	16	21	28						28	0.3433	0.5107	0.6502	0.8455						0.8455
Barbus meridionalis	T7	28-May-2012	87	9.9	2	13	22	25							25	0.427	0.6781	0.7618							0.7618
Barbus meridionalis	T7	28-May-2012	79	7.5	2	10	15	18							18	0.3433	0.4828	0.5665							0.5665
Barbus meridionalis	T7	28-May-2012	73	6	2	7	16	18							18	0.2596	0.5107	0.5665							0.5665
Barbus meridionalis	T7	28-May-2012	72	7.4	2	11	20	24							24	0.3712	0.6223	0.7339							0.7339
Barbus meridionalis	T7	28-May-2012	76	7.3	2	6	17	20							20	0.2317	0.5386	0.6223							0.6223
Barbus meridionalis	T7	28-May-2012	73	6.9	2	7	14	15							15	0.2596	0.4549	0.4828							0.4828
Barbus meridionalis	T7	28-May-2012	76	7.1	2	8	18	22							22	0.2875	0.5665	0.6781							0.6781
Barbus meridionalis	T7	28-May-2012	73	6.3	2	8	23	26							26	0.2875	0.706	0.7897							0.7897
Barbus meridionalis	T7	28-May-2012	75	7.3	2	10	16	20							20	0.3433	0.5107	0.6223							0.6223
Barbus meridionalis	T7	28-May-2012	76	8.2	2	10	21	24							24	0.3433	0.6502	0.7339							0.7339
Barbus meridionalis	T8	8-May-2012	153	66.8	5	7	20	32	40	50	52				52	0.2596	0.6223	0.9571	1.1803	1.4593	1.5151				1.5151
Barbus meridionalis	T8	8-May-2012	161	90.2	5	8	20	30	52	61	64				64	0.2875	0.6223	0.9013	1.5151	1.7662	1.8499				1.8499
Barbus meridionalis	T8	8-May-2012	175	92.5	5	7	20	38	50	59	59				59	0.2596	0.6223	1.1245	1.4593	1.7104	1.7104				1.7104
Barbus meridionalis	T8	8-May-2012	126	38.6	4	10	18	25	33	38					38	0.3433	0.5665	0.7618	0.985	1.1245					1.1245
Barbus meridionalis	T8	8-May-2012	182	107.3	5	11	27	39	55	63	63				63	0.3712	0.8176	1.1524	1.5988	1.822	1.822				1.822
Barbus meridionalis	T8	8-May-2012	137	42.9	3	16	35	47	53						53	0.5107	1.0408	1.3756	1.543						1.543
Barbus meridionalis	T8	8-May-2012	197	133.7	5	13	25	43	54	64	65				65	0.427	0.7618	1.264	1.5709	1.8499	1.8778				1.8778
Barbus meridionalis	T8	8-May-2012	163	69.4	5	11	22	33	45	52	53				53	0.3712	0.6781	0.985	1.3198	1.5151	1.543				1.543
Barbus meridionalis	T8	8-May-2012	153	60.5	4	8	17	29	54	61					61	0.2875	0.5386	0.8734	1.5709	1.7662					1.7662
Barbus meridionalis	T8	8-May-2012	130	40.7	3	13	27	35	42						42	0.427	0.8176	1.0408	1.2361						1.2361
Barbus meridionalis	T8	8-May-2012	110	24.4	2	10	28	36							36	0.3433	0.8455	1.0687							1.0687
Barbus meridionalis	T8	8-May-2012	125	30.3	4	10	25	33	47	50					50	0.3433	0.7618	0.985	1.3756	1.4593					1.4593
Barbus meridionalis	T8	8-May-2012	104	20	4	7	22	31	43	43					43	0.2596	0.6781	0.9292	1.264	1.264					1.264
Barbus meridionalis	T8	8-May-2012	108	17.7	3	7	21	29	37						37	0.2596	0.6502	0.8734	1.0966						1.0966
Barbus meridionalis	T8	8-May-2012	101	19	3	8	20	34	42						42	0.2875	0.6223	1.0129	1.2361						1.2361
Barbus meridionalis	T8	8-May-2012	107	19.3	3	7	27	41	45						45	0.2596	0.8176	1.2082	1.3198						1.3198
Barbus meridionalis	T8	8-May-2012	144	49.3	4	15	27	52	60	64					64	0.4828	0.8176	1.5151	1.7383	1.8499					1.8499
Barbus meridionalis	T8	8-May-2012	135	48.9	3	9	20	50	54						54	0.3154	0.6223	1.4593	1.5709						1.5709
Barbus meridionalis	T8	8-May-2012	120	36.7	2	12	43	49							49	0.3991	1.264	1.4314							1.4314
Barbus meridionalis	T8	8-May-2012	119	25.9	4	7	21	31	42	44					44	0.2596	0.6502	0.9292	1.2361	1.2919					1.2919
Barbus meridionalis	T8	8-May-2012	112	26.6	3	10	20	32	40						40	0.3433	0.6223	0.9571	1.1803						1.1803
Barbus meridionalis	T8	8-May-2012	146	50.4	4	7	10	26	47	52					52	0.2596	0.3433	0.7897	1.3756	1.5151					1.5151
Barbus meridionalis	T8	8-May-2012	111	23.6	4	10	20	33	40	43					43	0.3433	0.6223	0.985	1.1803	1.264					1.264
Barbus meridionalis	T8	8-May-2012	115	27.6	2	15	39	45							45	0.4828	1.1524	1.3198							1.3198
Barbus meridionalis	T8	8-May-2012	103	17.4	3	10	21	27	31						31	0.3433	0.6502	0.8176	0.9292						0.9292
Barbus meridionalis	T8	8-May-2012	113	28.3	2	15	30	37							37	0.4828	0.9013	1.0966							1.0966
Barbus meridionalis	T8	8-May-2012	123	27.4	3	11	32	43	43						43	0.3712	0.9571	1.264	1.264						1.264
Barbus meridionalis	T8	8-May-2012	94	13.1	2	8	15	20							20	0.2875	0.4828	0.6223							0.6223
Barbus meridionalis	T8	8-May-2012	92	12	2	9	19	25							25	0.3154	0.5944	0.7618							0.7618
Barbus meridionalis	T8	8-May-2012	170	97.8	4	14	29	48	58	64					64	0.4549	0.8734	1.4035	1.6825	1.8499					1.8499
Barbus meridionalis	T8	8-May-2012	117	26.3	3	15	26	30	33						33	0.4828	0.7897	0.9013	0.985						0.985
Barbus meridionalis	T8	8-May-2012	119	25.8	4	10	20	27	33	36					36	0.3433	0.6223	0.8176	0.985	1.0687					1.0687
Barbus meridionalis	T8	8-May-2012	111	24	3	9	19	26	33						33	0.3154	0.5944	0.7897	0.985						0.985
Barbus meridionalis	T8	8-May-2012	95	13.9	3	11	20	25	28						28	0.3712	0.6223	0.7618	0.8455						0.8455
Barbus meridionalis	T8	8-May-2012	100	16.8	3	13	22	29	38						38	0.427	0.6781	0.8734	1.1245						1.1245
Barbus meridionalis	T8	8-May-2012	185	96.9	5	10	19	44	55	59	62				62	0.3433	0.5944	1.2919	1.5988	1.7104	1.7941				1.7941
Barbus meridionalis	T8	8-May-2012	159	69	6	14	28	35	45	49	52	55			55	0.4549	0.8455	1.0408	1.3198	1.4314	1.5151	1.5988			1.5988
Barbus meridionalis	T8	8-May-2012	159	84.6	4	12	21	28	53	57					57	0.3991	0.6502	0.8455	1.543	1.6546					1.6546
Barbus meridionalis	T8	8-May-2012	163	74.5	5	8	15	28	52	61	65				65	0.2875	0.4828	0.8455	1.5151	1.7662	1.8778				1.8778
Barbus meridionalis	T8	8-May-2012	146	55.9	5	12	22	29	39	47	51				51	0.3991	0.6781	0.8734	1.1524	1.3756	1.4872				1.4872
Barbus meridionalis	T8	8-May-2012	147	52.8	5	11	21	31	41	48	51				51	0.3712	0.6502	0.9292	1.2082	1.4035	1.4872				1.4872
Barbus meridionalis	T8	8-May-2012	143	51.9	4	12	20	35	40	43					43	0.3991	0.6223	1.0408	1.1803	1.264					1.264
Barbus meridionalis	T8	8-May-2012	120	37.1	4	8	16	25	34	41					41	0.2875	0.5107	0.7618	1.0129	1.2082					1.2082
Barbus meridionalis	T8	8-May-2012	159	79.3	6	10	23	32	40	48	54	57			57	0.3433	0.706	0.9571	1.1803	1.4035	1.5709	1.6546			1.6546
Barbus meridionalis	T8	8-May-2012	118	32.6	4	14	23	29	38	46					46	0.4549	0.706	0.8734	1.1245	1.3477					1.3477
Barbus meridionalis	T8	8-May-2012	100	17.9	3	8	15	25	32						32	0.2875	0.4828	0.7618	0.9571						0.9571
Barbus meridionalis	T8	8-May-2012	122	32.4	3	19	36	47	53						53	0.5944	1.0687	1.3756	1.543						1.543
Barbus meridionalis	T8	8-May-2012	153	69.3	5	7	12	20	36	47	50				50	0.2596	0.3991	0.6223	1.0687	1.3756	1.4593				1.4593
Barbus meridionalis	T8	8-May-2012	114	24	4	12	19	25	30	32					32	0.3991	0.5944	0.7618	0.9013	0.9571					0.9571
Barbus meridionalis	T8	8-May-2012	124	39.7	3	10	21	30	37						37	0.3433	0.6502	0.9013	1.0966						1.0966
Barbus meridionalis	T8	8-May-2012	145	55.8	5	11	22	31	41	47	51				51	0.3712	0.6781	0.9292	1.2082	1.3756	1.4872				1.4872
Barbus meridionalis	T8	8-May-2012	162	72.2	3	9	25	41	46						46	0.3154	0.7618	1.2082	1.3477						1.3477
Barbus meridionalis	T8	8-May-2012	136	48.4	3	15	26	37	43						43	0.4828	0.7897	1.0966	1.264						1.264
Barbus meridionalis	T8	8-May-2012	107	18.7	5	12	23	29	34	38	41				41	0.3991	0.706	0.8734	1.0129	1.1245	1.2082				1.2082
Barbus meridionalis	T8	8-May-2012	104	14.9	4	12	28	33	37	40					40	0.3991	0.8455	0.985	1.0966	1.1803					1.1803
Barbus meridionalis	T8	8-May-2012	105	17.3	4	8	15	21	32	36					36	0.2875	0.4828	0.6502	0.9571	1.0687					1.0687
Barbus meridionalis	T8	8-May-2012	149	50.3	5	12	21	28	41	47	51				51	0.3991	0.6502	0.8455	1.2082	1.3756	1.4872				1.4872
Barbus meridionalis	T8	8-May-2012	113	24.8	3	12	21	31	45						45	0.3991	0.6502	0.9292	1.3198						1.3198
Barbus meridionalis	T8	8-May-2012	112	20.5	3	11	22	26	28						28	0.3712	0.6781	0.7897	0.8455						0.8455
Barbus meridionalis	T8	8-May-2012	128	40.7	3	10	26	39	43						43	0.3433	0.7897	1.1524	1.264						1.264
Barbus meridionalis	T8	8-May-2012	146	49.2	5	7	16	23	36	39	41				41	0.2596	0.5107	0.706	1.0687	1.1524	1.2082				1.2082
Barbus meridionalis	T8	8-May-2012	130	32.2	4	9	23	29	37	42					42	0.3154	0.706	0.8734	1.0966	1.2361					1.2361
Barbus meridionalis	T8	8-May-2012	112	19.4	4	12	21	25	29	33					33	0.3991	0.6502	0.7618	0.8734	0.985					0.985
Barbus meridionalis	T8	8-May-2012	97	15.7	4	8	18	24	33	39					39	0.2875	0.5665	0.7339	0.985	1.1524					1.1524
Barbus meridionalis	T8	8-May-2012	85	9.9	3	10	16	21	24						24	0.3433	0.5107	0.6502	0.7339						0.7339
Barbus meridionalis	T8	8-May-2012	87	10.9	2	10	20	25							25	0.3433	0.6223	0.7618							0.7618
Barbus meridionalis	T8	8-May-2012	55	3	1	14	19								19	0.4549	0.5944								0.5944
Barbus meridionalis	T8	8-May-2012	64	3.4	2	7	16	24							24	0.2596	0.5107	0.7339							0.7339
Barbus meridionalis	T8	8-May-2012	82	8.9	3	10	16	21	24						24	0.3433	0.5107	0.6502	0.7339						0.7339
Barbus meridionalis	T8	8-May-2012	95	13.7	4	10	18	24	27	28					28	0.3433	0.5665	0.7339	0.8176	0.8455					0.8455
Barbus meridionalis	T8	8-May-2012	112	26.9	3	15	34	42	52						52	0.4828	1.0129	1.2361	1.5151						1.5151
Barbus meridionalis	T8	8-May-2012	112	25.7	2	14	29	40							40	0.4549	0.8734	1.1803							1.1803
Barbus meridionalis	T8	8-May-2012	168	70.9	5	11	24	43	49	54	57				57	0.3712	0.7339	1.264	1.4314	1.5709	1.6546				1.6546
Barbus meridionalis	T8	8-May-2012	121	27.2	5	10	21	30	38	42	44				44	0.3433	0.6502	0.9013	1.1245	1.2361	1.2919				1.2919
Barbus meridionalis	T8	8-May-2012	112	25.7	3	12	28	36	40						40	0.3991	0.8455	1.0687	1.1803						1.1803
Barbus meridionalis	T8	8-May-2012	185	105.9	5	11	23	33	41	54	59				59	0.3712	0.706	0.985	1.2082	1.5709	1.7104				1.7104
Barbus meridionalis	T8	8-May-2012	160	73.6	4	11	20	32	50	56					56	0.3712	0.6223	0.9571	1.4593	1.6267					1.6267
Barbus meridionalis	T8	29-May-2012	143	51.2	3	11	20	42	50						50	0.3712	0.6223	1.2361	1.4593						1.4593
Barbus meridionalis	T8	29-May-2012	159	75.6	5	8	16	24	38	43	45				45	0.2875	0.5107	0.7339	1.1245	1.264	1.3198				1.3198
Barbus meridionalis	T8	29-May-2012	106	22	3	9	19	26	36						36	0.3154	0.5944	0.7897	1.0687						1.0687
Barbus meridionalis	T8	29-May-2012	113	23.2	5	8	18	25	32	36	38				38	0.2875	0.5665	0.7618	0.9571	1.0687	1.1245				1.1245
Barbus meridionalis	T8	29-May-2012	95	14.7	2	13	22	27							27	0.427	0.6781	0.8176							0.8176
Barbus meridionalis	T8	29-May-2012	77	7.5	1	17	23								23	0.5386	0.706								0.706
Barbus meridionalis	T8	29-May-2012	118	30.7	4	7	12	21	26	28					28	0.2596	0.3991	0.6502	0.7897	0.8455					0.8455
Barbus meridionalis	T8	29-May-2012	118	23.5	4	7	15	23	30	32					32	0.2596	0.4828	0.706	0.9013	0.9571					0.9571
Barbus meridionalis	T8	29-May-2012	78	8.2	2	8	18	21							21	0.2875	0.5665	0.6502							0.6502
Barbus meridionalis	T8	29-May-2012	122	33.1	3	11	22	30	39						39	0.3712	0.6781	0.9013	1.1524						1.1524
Barbus meridionalis	T8	29-May-2012	168	77.3	4	13	29	45	58	62					62	0.427	0.8734	1.3198	1.6825	1.7941					1.7941
Barbus meridionalis	T8	29-May-2012	104	17.4	2	8	21	26							26	0.2875	0.6502	0.7897							0.7897
Barbus meridionalis	T8	29-May-2012	84	9.4	3	7	19	22	25						25	0.2596	0.5944	0.6781	0.7618						0.7618
Barbus meridionalis	T8	29-May-2012	78	8.1	1	15	20								20	0.4828	0.6223								0.6223
Barbus meridionalis	T8	29-May-2012	160	73.4	4	9	17	25	47	50					50	0.3154	0.5386	0.7618	1.3756	1.4593					1.4593
Barbus meridionalis	T8	29-May-2012	86	13.1	2	11	19	28							28	0.3712	0.5944	0.8455							0.8455
Barbus meridionalis	T8	29-May-2012	162	81.4	4	16	27	39	46	50					50	0.5107	0.8176	1.1524	1.3477	1.4593					1.4593
Barbus meridionalis	T8	29-May-2012	114	27.2	3	13	27	32	38						38	0.427	0.8176	0.9571	1.1245						1.1245
Barbus meridionalis	T8	29-May-2012	114	29.8	3	16	21	30	34						34	0.5107	0.6502	0.9013	1.0129						1.0129
Barbus meridionalis	T8	29-May-2012	156	73.8	4	9	26	41	50	54					54	0.3154	0.7897	1.2082	1.4593	1.5709					1.5709
Barbus meridionalis	T8	29-May-2012	166	82.5	4	8	16	30	48	50					50	0.2875	0.5107	0.9013	1.4035	1.4593					1.4593
Barbus meridionalis	T8	29-May-2012	70	5.2	2	8	14	19							19	0.2875	0.4549	0.5944							0.5944
Barbus meridionalis	T8	29-May-2012	70	6.1	1	10	18								18	0.3433	0.5665								0.5665
Barbus meridionalis	T8	29-May-2012	74	8.1	1	15	25								25	0.4828	0.7618								0.7618
Barbus meridionalis	T8	29-May-2012	72	5.5	2	9	17	24							24	0.3154	0.5386	0.7339							0.7339
Barbus meridionalis	T8	29-May-2012	139	43.7	4	9	17	31	43	49					49	0.3154	0.5386	0.9292	1.264	1.4314					1.4314
Barbus meridionalis	T8	29-May-2012	97	12.5	4	11	21	28	32	36					36	0.3712	0.6502	0.8455	0.9571	1.0687					1.0687
Barbus meridionalis	T8	29-May-2012	127	38.7	2	15	28	36							36	0.4828	0.8455	1.0687							1.0687
Barbus meridionalis	T8	29-May-2012	107	17.1	3	6	14	22	30						30	0.2317	0.4549	0.6781	0.9013						0.9013
Barbus meridionalis	T8	29-May-2012	153	63.4	3	9	22	48	53						53	0.3154	0.6781	1.4035	1.543						1.543
Barbus meridionalis	T8	5-Jun-2012	155	60	4	12	23	43	58	62					62	0.3991	0.706	1.264	1.6825	1.7941					1.7941
Barbus meridionalis	T8	5-Jun-2012	142	50.5	4	6	13	30	39	43					43	0.2317	0.427	0.9013	1.1524	1.264					1.264
Barbus meridionalis	T8	5-Jun-2012	131	38	2	9	29	33							33	0.3154	0.8734	0.985							0.985
Barbus meridionalis	T8	5-Jun-2012	162	56.2	4	10	25	37	49	56					56	0.3433	0.7618	1.0966	1.4314	1.6267					1.6267
Barbus meridionalis	T8	5-Jun-2012	153	66.6	5	10	20	29	38	46	48				48	0.3433	0.6223	0.8734	1.1245	1.3477	1.4035				1.4035
Barbus meridionalis	T8	5-Jun-2012	153	60.9	4	9	24	45	56	59					59	0.3154	0.7339	1.3198	1.6267	1.7104					1.7104
Barbus meridionalis	T8	5-Jun-2012	155	60.8	4	10	23	32	47	53					53	0.3433	0.706	0.9571	1.3756	1.543					1.543
Barbus meridionalis	T8	5-Jun-2012	108	21.3	4	8	15	27	32	33					33	0.2875	0.4828	0.8176	0.9571	0.985					0.985
Barbus meridionalis	T8	5-Jun-2012	140	51.8	3	7	24	40	43						43	0.2596	0.7339	1.1803	1.264						1.264
Barbus meridionalis	T8	5-Jun-2012	148	57.8	4	9	21	38	47	51					51	0.3154	0.6502	1.1245	1.3756	1.4872					1.4872
Barbus meridionalis	T8	5-Jun-2012	125	32.4	2	18	37	51							51	0.5665	1.0966	1.4872							1.4872
Barbus meridionalis	T8	5-Jun-2012	88	11	1	17	25								25	0.5386	0.7618								0.7618
Barbus meridionalis	T8	5-Jun-2012	163	66.9	5	9	18	27	43	49	52				52	0.3154	0.5665	0.8176	1.264	1.4314	1.5151				1.5151
Barbus meridionalis	T8	5-Jun-2012	165	89.5	5	11	22	35	62	69	74				74	0.3712	0.6781	1.0408	1.7941	1.9894	2.1289				2.1289
Barbus meridionalis	T8	5-Jun-2012	147	63.5	4	7	17	22	47	53					53	0.2596	0.5386	0.6781	1.3756	1.543					1.543
Barbus meridionalis	T8	5-Jun-2012	128	29.9	4	7	20	26	37	40					40	0.2596	0.6223	0.7897	1.0966	1.1803					1.1803
Barbus meridionalis	T8	5-Jun-2012	81	8.7	1	13	24								24	0.427	0.7339								0.7339
Barbus meridionalis	T8	5-Jun-2012	81	10.5	1	15	27								27	0.4828	0.8176								0.8176
Barbus meridionalis	T8	5-Jun-2012	104	17.4	3	10	16	25	33						33	0.3433	0.5107	0.7618	0.985						0.985
Barbus meridionalis	T8	5-Jun-2012	115	27.3	3	8	20	26	41						41	0.2875	0.6223	0.7897	1.2082						1.2082
Barbus meridionalis	T8	5-Jun-2012	112	18.9	3	7	16	22	28						28	0.2596	0.5107	0.6781	0.8455						0.8455
Barbus meridionalis	T8	5-Jun-2012	88	9.7	1	15	23								23	0.4828	0.706								0.706
Barbus meridionalis	T8	5-Jun-2012	133	38.2	3	13	29	37	48						48	0.427	0.8734	1.0966	1.4035						1.4035
Barbus meridionalis	T8	5-Jun-2012	115	23	3	10	19	29	35						35	0.3433	0.5944	0.8734	1.0408						1.0408
Barbus meridionalis	T8	5-Jun-2012	131	39.8	2	15	36	43							43	0.4828	1.0687	1.264							1.264
Barbus meridionalis	T8	5-Jun-2012	122	37.4	2	10	28	37							37	0.3433	0.8455	1.0966							1.0966
Barbus meridionalis	T8	5-Jun-2012	81	9.1	1	17	25								25	0.5386	0.7618								0.7618
Barbus meridionalis	T8	5-Jun-2012	122	25.3	2	9	27	36							36	0.3154	0.8176	1.0687							1.0687
Barbus meridionalis	T8	5-Jun-2012	78	8.5	1	12	21								21	0.3991	0.6502								0.6502
Barbus meridionalis	T8	5-Jun-2012	155	72.4	4	12	25	42	50	55					55	0.3991	0.7618	1.2361	1.4593	1.5988					1.5988
Barbus meridionalis	T8	5-Jun-2012	113	23	4	7	18	26	37	39					39	0.2596	0.5665	0.7897	1.0966	1.1524					1.1524
Barbus meridionalis	T8	5-Jun-2012	76	7.3	1	10	21								21	0.3433	0.6502								0.6502
Barbus meridionalis	T8	5-Jun-2012	78	8.7	2	7	17	28							28	0.2596	0.5386	0.8455							0.8455
Barbus meridionalis	T8	5-Jun-2012	88	12	1	18	27								27	0.5665	0.8176								0.8176
Barbus meridionalis	T8	5-Jun-2012	90	10.6	1	29	35								35	0.8734	1.0408								1.0408
Barbus meridionalis	T8	5-Jun-2012	113	24.6	2	11	20	28							28	0.3712	0.6223	0.8455							0.8455
Barbus meridionalis	T8	5-Jun-2012	83	8.6	1	15	29								29	0.4828	0.8734								0.8734
Barbus meridionalis	T8	5-Jun-2012	79	6.8	1	15	23								23	0.4828	0.706								0.706
Barbus meridionalis	T8	5-Jun-2012	72	6.8	1	13	29								29	0.427	0.8734								0.8734
Barbus meridionalis	T8	5-Jun-2012	171	89	4	7	15	28	48	53					53	0.2596	0.4828	0.8455	1.4035	1.543					1.543
Barbus meridionalis	T8	5-Jun-2012	114	28	2	12	26	39							39	0.3991	0.7897	1.1524							1.1524
Barbus meridionalis	T8	5-Jun-2012	135	33.1	3	12	25	37	44						44	0.3991	0.7618	1.0966	1.2919						1.2919
Barbus meridionalis	T8	5-Jun-2012	109	17.9	3	10	19	33	37						37	0.3433	0.5944	0.985	1.0966						1.0966
Barbus meridionalis	T8	5-Jun-2012	96	5.3	2	17	24	27							27	0.5386	0.7339	0.8176							0.8176
Barbus meridionalis	T8	5-Jun-2012	107	23.1	2	7	27	30							30	0.2596	0.8176	0.9013							0.9013
Barbus meridionalis	T8	5-Jun-2012	110	27.6	2	8	21	30							30	0.2875	0.6502	0.9013							0.9013
Barbus meridionalis	T8	5-Jun-2012	108	19.5	3	7	15	28	38						38	0.2596	0.4828	0.8455	1.1245						1.1245
Barbus meridionalis	T8	5-Jun-2012	79	8.2	1	15	25								25	0.4828	0.7618								0.7618
Barbus meridionalis	T8	5-Jun-2012	82	8.5	1	14	27								27	0.4549	0.8176								0.8176
Barbus meridionalis	T8	5-Jun-2012	80	8.4	1	11	27								27	0.3712	0.8176								0.8176
Barbus meridionalis	T8	5-Jun-2012	70	5.8	1	15	22								22	0.4828	0.6781								0.6781
Barbus meridionalis	T8	5-Jun-2012	73	5.9	1	14	17								17	0.4549	0.5386								0.5386
Barbus meridionalis	T8	5-Jun-2012	73	6.6	1	10	17								17	0.3433	0.5386								0.5386
Barbus meridionalis	T8	5-Jun-2012	70	5.8	1	9	18								18	0.3154	0.5665								0.5665
Barbus meridionalis	T8	5-Jun-2012	73	6.3	1	13	24								24	0.427	0.7339								0.7339
Barbus meridionalis	T8	5-Jun-2012	94	13.3	2	8	25	31							31	0.2875	0.7618	0.9292							0.9292
Barbus meridionalis	T8	5-Jun-2012	78	8.2	1	10	20								20	0.3433	0.6223								0.6223
Barbus meridionalis	T8	5-Jun-2012	80	7.5	1	9	18								18	0.3154	0.5665								0.5665
Barbus meridionalis	T8	5-Jun-2012	79	8.6	1	15	26								26	0.4828	0.7897								0.7897
Barbus meridionalis	T9	16-May-2012	175	92.6	5	12	24	36	46	58	61				61	0.3991	0.7339	1.0687	1.3477	1.6825	1.7662				1.7662
Barbus meridionalis	T9	16-May-2012	121	37.1	3	9	19	31	38						38	0.3154	0.5944	0.9292	1.1245						1.1245
Barbus meridionalis	T9	16-May-2012	121	45.1	6	12	26	32	44	53	62	68			68	0.3991	0.7897	0.9571	1.2919	1.543	1.7941	1.9615			1.9615
Barbus meridionalis	T9	16-May-2012	156	79.1	4	11	21	39	45	47					47	0.3712	0.6502	1.1524	1.3198	1.3756					1.3756
Barbus meridionalis	T9	16-May-2012	125	57.8	3	9	34	43	50						50	0.3154	1.0129	1.264	1.4593						1.4593
Barbus meridionalis	T9	16-May-2012	157	75.2	5	9	21	32	48	53	55				55	0.3154	0.6502	0.9571	1.4035	1.543	1.5988				1.5988
Barbus meridionalis	T9	16-May-2012	140	57.7	2	17	31	35							35	0.5386	0.9292	1.0408							1.0408
Barbus meridionalis	T9	16-May-2012	149	53.5	3	17	24	35	42						42	0.5386	0.7339	1.0408	1.2361						1.2361
Barbus meridionalis	T9	16-May-2012	132	51.8	2	12	32	40							40	0.3991	0.9571	1.1803							1.1803
Barbus meridionalis	T9	16-May-2012	106	22.5	2	11	22	28							28	0.3712	0.6781	0.8455							0.8455
Barbus meridionalis	T9	16-May-2012	109	29.9	2	6	24	33							33	0.2317	0.7339	0.985							0.985
Barbus meridionalis	T9	16-May-2012	142	49.9	2	10	33	38							38	0.3433	0.985	1.1245							1.1245
Barbus meridionalis	T9	16-May-2012	145	58.2	4	10	20	28	40	45					45	0.3433	0.6223	0.8455	1.1803	1.3198					1.3198
Barbus meridionalis	T9	16-May-2012	111	30.2	3	13	20	28	37						37	0.427	0.6223	0.8455	1.0966						1.0966
Barbus meridionalis	T9	16-May-2012	93	16.1	2	14	21	30							30	0.4549	0.6502	0.9013							0.9013
Barbus meridionalis	T9	16-May-2012	78	7.9	2	6	17	20							20	0.2317	0.5386	0.6223							0.6223
Barbus meridionalis	T9	16-May-2012	101	17.1	2	13	21	28							28	0.427	0.6502	0.8455							0.8455
Barbus meridionalis	T9	16-May-2012	104	24.8	3	6	14	22	28						28	0.2317	0.4549	0.6781	0.8455						0.8455
Barbus meridionalis	T9	16-May-2012	118	31.2	2	7	21	31							31	0.2596	0.6502	0.9292							0.9292
Barbus meridionalis	T9	16-May-2012	83	11.8	3	8	14	20	24						24	0.2875	0.4549	0.6223	0.7339						0.7339
Barbus meridionalis	T9	16-May-2012	99	16.2	3	7	17	27	35						35	0.2596	0.5386	0.8176	1.0408						1.0408
Barbus meridionalis	T9	16-May-2012	130	43.8	3	13	25	35	40						40	0.427	0.7618	1.0408	1.1803						1.1803
Barbus meridionalis	T9	16-May-2012	133	52.6	3	8	23	34	39						39	0.2875	0.706	1.0129	1.1524						1.1524
Barbus meridionalis	T9	16-May-2012	104	23.9	3	8	19	30	35						35	0.2875	0.5944	0.9013	1.0408						1.0408
Barbus meridionalis	T9	16-May-2012	166	92.9	5	9	19	33	43	47	52				52	0.3154	0.5944	0.985	1.264	1.3756	1.5151				1.5151
Barbus meridionalis	T9	16-May-2012	102	20.4	3	10	20	28	31						31	0.3433	0.6223	0.8455	0.9292						0.9292
Barbus meridionalis	T9	16-May-2012	104	24.3	3	10	19	26	31						31	0.3433	0.5944	0.7897	0.9292						0.9292
Barbus meridionalis	T9	16-May-2012	161	86.5	5	11	23	35	47	59	64				64	0.3712	0.706	1.0408	1.3756	1.7104	1.8499				1.8499
Barbus meridionalis	T9	16-May-2012	139	44.1	4	11	21	33	42	45					45	0.3712	0.6502	0.985	1.2361	1.3198					1.3198
Barbus meridionalis	T9	16-May-2012	146	71.4	4	19	22	30	35	39					39	0.5944	0.6781	0.9013	1.0408	1.1524					1.1524
Barbus meridionalis	T9	16-May-2012	92	13.5	3	6	13	19	24						24	0.2317	0.427	0.5944	0.7339						0.7339
Barbus meridionalis	T9	16-May-2012	104	20	3	6	15	20	30						30	0.2317	0.4828	0.6223	0.9013						0.9013
Barbus meridionalis	T9	16-May-2012	161	88.6	5	10	19	28	42	50	53				53	0.3433	0.5944	0.8455	1.2361	1.4593	1.543				1.543
Barbus meridionalis	T9	16-May-2012	102	20.6	2	8	18	29							29	0.2875	0.5665	0.8734							0.8734
Barbus meridionalis	T9	16-May-2012	114	29.8	3	10	19	27	37						37	0.3433	0.5944	0.8176	1.0966						1.0966
Barbus meridionalis	T9	16-May-2012	151	69.4	4	8	25	43	49	52					52	0.2875	0.7618	1.264	1.4314	1.5151					1.5151
Barbus meridionalis	T9	16-May-2012	103	23.5	4	9	20	29	33	37					37	0.3154	0.6223	0.8734	0.985	1.0966					1.0966
Barbus meridionalis	T9	16-May-2012	138	27.9	5	7	11	26	35	41	43				43	0.2596	0.3712	0.7897	1.0408	1.2082	1.264				1.264
Barbus meridionalis	T9	16-May-2012	112	32.2	3	10	20	30	40						40	0.3433	0.6223	0.9013	1.1803						1.1803
Barbus meridionalis	T9	16-May-2012	104	27.5	2	17	29	35							35	0.5386	0.8734	1.0408							1.0408
Barbus meridionalis	T9	16-May-2012	90	15.7	2	11	19	23							23	0.3712	0.5944	0.706							0.706
Barbus meridionalis	T9	16-May-2012	84	11.8	2	9	20	24							24	0.3154	0.6223	0.7339							0.7339
Barbus meridionalis	T9	16-May-2012	111	25.5	4	12	20	27	32	35					35	0.3991	0.6223	0.8176	0.9571	1.0408					1.0408
Barbus meridionalis	T9	16-May-2012	75	7.7	3	6	13	17	21						21	0.2317	0.427	0.5386	0.6502						0.6502
Barbus meridionalis	T9	16-May-2012	115	28.3	3	13	21	28	32						32	0.427	0.6502	0.8455	0.9571						0.9571
Barbus meridionalis	T9	16-May-2012	82	10.8	3	7	15	23	27						27	0.2596	0.4828	0.706	0.8176						0.8176
Barbus meridionalis	T9	16-May-2012	132	48.9	4	8	19	35	43	49					49	0.2875	0.5944	1.0408	1.264	1.4314					1.4314
Barbus meridionalis	T9	16-May-2012	109	28.2	2	11	32	36							36	0.3712	0.9571	1.0687							1.0687
Barbus meridionalis	T9	16-May-2012	102	19.5	3	14	19	25	29						29	0.4549	0.5944	0.7618	0.8734						0.8734
Barbus meridionalis	T9	16-May-2012	87	12.8	2	11	20	25							25	0.3712	0.6223	0.7618							0.7618
Barbus meridionalis	T9	16-May-2012	87	12	3	11	17	22	26						26	0.3712	0.5386	0.6781	0.7897						0.7897
Barbus meridionalis	T9	16-May-2012	87	12.1	2	14	22	25							25	0.4549	0.6781	0.7618							0.7618
Barbus meridionalis	T9	16-May-2012	109	24.2	4	10	17	25	29	33					33	0.3433	0.5386	0.7618	0.8734	0.985					0.985
Barbus meridionalis	T9	16-May-2012		62	4	7	30	45	53	56					56	0.2596	0.9013	1.3198	1.543	1.6267					1.6267
Barbus meridionalis	T9	16-May-2012	91	15.1	2	13	23	27							27	0.427	0.706	0.8176							0.8176
Barbus meridionalis	T9	16-May-2012	87	12.4	2	8	21	24							24	0.2875	0.6502	0.7339							0.7339
Barbus meridionalis	T9	16-May-2012	91	12.5	2	12	22	25							25	0.3991	0.6781	0.7618							0.7618
Barbus meridionalis	T9	16-May-2012	160	75.6	3	10	21	40	45						45	0.3433	0.6502	1.1803	1.3198						1.3198
Barbus meridionalis	T9	16-May-2012	149	59.4	3	22	30	39	43						43	0.6781	0.9013	1.1524	1.264						1.264
Barbus meridionalis	T9	16-May-2012	161	80.9	5	8	14	24	33	45	47				47	0.2875	0.4549	0.7339	0.985	1.3198	1.3756				1.3756
Barbus meridionalis	T9	16-May-2012	126	31.5	4	7	14	25	30	32					32	0.2596	0.4549	0.7618	0.9013	0.9571					0.9571
Barbus meridionalis	T9	16-May-2012	119	29.2	3	12	20	27	34						34	0.3991	0.6223	0.8176	1.0129						1.0129
Barbus meridionalis	T9	16-May-2012	158	74.5	4	8	15	25	33	38					38	0.2875	0.4828	0.7618	0.985	1.1245					1.1245
Barbus meridionalis	T9	16-May-2012	103	20.6	3	9	20	30	35						35	0.3154	0.6223	0.9013	1.0408						1.0408
Barbus meridionalis	T9	16-May-2012	113	24.9	4	13	19	25	29	32					32	0.427	0.5944	0.7618	0.8734	0.9571					0.9571
Barbus meridionalis	T9	16-May-2012	86	12.2	2	7	20	24							24	0.2596	0.6223	0.7339							0.7339
Barbus meridionalis	T9	16-May-2012	106	21.6	3	8	16	24	27						27	0.2875	0.5107	0.7339	0.8176						0.8176
Barbus meridionalis	T9	16-May-2012	87	12.3	3	12	15	23	27						27	0.3991	0.4828	0.706	0.8176						0.8176
Barbus meridionalis	T9	16-May-2012	141	66.8	3	9	15	27	31						31	0.3154	0.4828	0.8176	0.9292						0.9292
Barbus meridionalis	T9	16-May-2012	152	63.8	5	7	15	21	35	41	45				44	0.2596	0.4828	0.6502	1.0408	1.2082	1.3198				1.2919
Barbus meridionalis	T9	16-May-2012	147	57	4	8	20	35	42	45					45	0.2875	0.6223	1.0408	1.2361	1.3198					1.3198
Barbus meridionalis	T9	16-May-2012	106	26.7	3	6	22	30	38						38	0.2317	0.6781	0.9013	1.1245						1.1245
Barbus meridionalis	T9	16-May-2012	137	56.6	4	8	16	27	48	53					53	0.2875	0.5107	0.8176	1.4035	1.543					1.543
Barbus meridionalis	T9	16-May-2012	121	44.8	3	12	22	35	43						43	0.3991	0.6781	1.0408	1.264						1.264
Barbus meridionalis	T9	16-May-2012	99	20.3	2	7	18	26							26	0.2596	0.5665	0.7897							0.7897
Barbus meridionalis	T9	16-May-2012	112	32.9	4	7	15	21	30	36					36	0.2596	0.4828	0.6502	0.9013	1.0687					1.0687
Barbus meridionalis	T9	16-May-2012	116	30.8	3	12	22	32	37						37	0.3991	0.6781	0.9571	1.0966						1.0966
Barbus meridionalis	T9	16-May-2012	101	18.4	2	6	18	28							28	0.2317	0.5665	0.8455							0.8455
Barbus meridionalis	T9	16-May-2012	94	15.1	3	8	15	20	24						24	0.2875	0.4828	0.6223	0.7339						0.7339
Barbus meridionalis	T9	16-May-2012	106	20.4	4	9	19	23	28	30					30	0.3154	0.5944	0.706	0.8455	0.9013					0.9013
Barbus meridionalis	T9	16-May-2012	123	33.4	4	10	18	29	34	36					36	0.3433	0.5665	0.8734	1.0129	1.0687					1.0687
Barbus meridionalis	T9	16-May-2012	94	13.6	3	9	19	24	27						27	0.3154	0.5944	0.7339	0.8176						0.8176
Barbus meridionalis	T9	16-May-2012	125	38.1	3	8	26	34	37						37	0.2875	0.7897	1.0129	1.0966						1.0966
Barbus meridionalis	T9	16-May-2012	125	36.8	4	8	15	24	33	35					35	0.2875	0.4828	0.7339	0.985	1.0408					1.0408
Barbus meridionalis	T9	16-May-2012		43.1	3	11	23	37	44						44	0.3712	0.706	1.0966	1.2919						1.2919
Barbus meridionalis	T9	16-May-2012	160	81	5	7	12	16	20	28	32				32	0.2596	0.3991	0.5107	0.6223	0.8455	0.9571				0.9571
Barbus meridionalis	T9	16-May-2012	104	22.3	3	8	16	21	28						28	0.2875	0.5107	0.6502	0.8455						0.8455
Barbus meridionalis	T9	16-May-2012	121	31.1	4	18	28	33	39	42					42	0.5665	0.8455	0.985	1.1524	1.2361					1.2361
Barbus meridionalis	T9	16-May-2012	110	22.5	4	10	18	26	30	32					32	0.3433	0.5665	0.7897	0.9013	0.9571					0.9571
Barbus meridionalis	T9	16-May-2012	131	37.3	5	7	20	26	33	38	41				41	0.2596	0.6223	0.7897	0.985	1.1245	1.2082				1.2082
Barbus meridionalis	T9	16-May-2012	176	95.5	5	10	23	29	36	44	47				47	0.3433	0.706	0.8734	1.0687	1.2919	1.3756				1.3756
Barbus meridionalis	T9	16-May-2012	129	50.3	3	12	25	32	38						38	0.3991	0.7618	0.9571	1.1245						1.1245
Barbus meridionalis	T9	16-May-2012	166	92.2	4	12	26	37	48	50					50	0.3991	0.7897	1.0966	1.4035	1.4593					1.4593
Barbus meridionalis	T9	16-May-2012	146	61.1	4	14	25	34	38	42					42	0.4549	0.7618	1.0129	1.1245	1.2361					1.2361
Barbus meridionalis	T9	16-May-2012	122	36.6	4	10	23	31	37	46					46	0.3433	0.706	0.9292	1.0966	1.3477					1.3477
Barbus meridionalis	T9	16-May-2012	130	37.1	3	9	18	26	30						30	0.3154	0.5665	0.7897	0.9013						0.9013
Barbus meridionalis	T9	16-May-2012	108	22.5	3	11	20	29	36						36	0.3712	0.6223	0.8734	1.0687						1.0687
Barbus meridionalis	T9	16-May-2012	108	19.9	3	7	14	20	24						24	0.2596	0.4549	0.6223	0.7339						0.7339
Barbus meridionalis	T9	16-May-2012	135	46.1	4	9	17	25	32	39					39	0.3154	0.5386	0.7618	0.9571	1.1524					1.1524
Barbus meridionalis	T9	16-May-2012	134	44.7	4	11	18	27	32	36					36	0.3712	0.5665	0.8176	0.9571	1.0687					1.0687
Barbus meridionalis	T9	16-May-2012	130	40.8	3	8	18	28	32						32	0.2875	0.5665	0.8455	0.9571						0.9571
Barbus meridionalis	T9	16-May-2012	125	37.9	3	9	20	32	38						38	0.3154	0.6223	0.9571	1.1245						1.1245
Barbus meridionalis	T9	16-May-2012	107	21.2	2	14	22	31							31	0.4549	0.6781	0.9292							0.9292
Barbus meridionalis	T9	16-May-2012	119	32.7	3	9	22	30	35						35	0.3154	0.6781	0.9013	1.0408						1.0408
Barbus meridionalis	T9	16-May-2012		56.5	4	7	19	27	34	39					39	0.2596	0.5944	0.8176	1.0129	1.1524					1.1524
Barbus meridionalis	T9	16-May-2012	114	28.4	4	10	15	20	28	32					32	0.3433	0.4828	0.6223	0.8455	0.9571					0.9571
Barbus meridionalis	T9	16-May-2012	128	39.7	3	13	26	38	44						44	0.427	0.7897	1.1245	1.2919						1.2919
Barbus meridionalis	T9	16-May-2012	94	14.3	3	8	14	20	22						22	0.2875	0.4549	0.6223	0.6781						0.6781
Barbus meridionalis	T9	16-May-2012	114	31	3	7	16	24	30						30	0.2596	0.5107	0.7339	0.9013						0.9013
Barbus meridionalis	T9	16-May-2012	87	13.3	3	7	16	23	25						25	0.2596	0.5107	0.706	0.7618						0.7618
Barbus meridionalis	T9	16-May-2012	128	43.1	3	8	15	24	33						33	0.2875	0.4828	0.7339	0.985						0.985
Barbus meridionalis	T9	16-May-2012	145	57.4	3	16	26	39	45						45	0.5107	0.7897	1.1524	1.3198						1.3198
Barbus meridionalis	T9	16-May-2012	108	22.7	3	13	20	27	31						31	0.427	0.6223	0.8176	0.9292						0.9292
Barbus meridionalis	T9	16-May-2012	152	61.8	5	12	20	26	32	43	48				48	0.3991	0.6223	0.7897	0.9571	1.264	1.4035				1.4035
Barbus meridionalis	T9	16-May-2012	129	40.1	4	12	22	31	38	47					47	0.3991	0.6781	0.9292	1.1245	1.3756					1.3756
Barbus meridionalis	T9	16-May-2012	137	45.5	4	10	18	27	36	40					40	0.3433	0.5665	0.8176	1.0687	1.1803					1.1803
Barbus meridionalis	T9	16-May-2012	168	85	3	12	23	41	47						47	0.3991	0.706	1.2082	1.3756						1.3756
Barbus meridionalis	T9	16-May-2012	120		3	9	19	29	39						39	0.3154	0.5944	0.8734	1.1524						1.1524
Barbus meridionalis	T9	16-May-2012	152	53.1	4	11	20	32	45	49					49	0.3712	0.6223	0.9571	1.3198	1.4314					1.4314
Barbus meridionalis	T9	16-May-2012	168	73.2	4	8	22	37	41	50					50	0.2875	0.6781	1.0966	1.2082	1.4593					1.4593
Barbus meridionalis	T9	16-May-2012	132	36.8	4	9	17	26	31	35					35	0.3154	0.5386	0.7897	0.9292	1.0408					1.0408
Barbus meridionalis	T9	16-May-2012	141	50.3	4	19	21	32	41	47					47	0.5944	0.6502	0.9571	1.2082	1.3756					1.3756
Barbus meridionalis	T9	16-May-2012	140	43.1	4	9	17	25	32	36					36	0.3154	0.5386	0.7618	0.9571	1.0687					1.0687
Barbus meridionalis	T9	16-May-2012	131	47.2	4	11	19	31	41	47					47	0.3712	0.5944	0.9292	1.2082	1.3756					1.3756
Barbus meridionalis	T9	16-May-2012	126	38	4	8	18	34	43	50					50	0.2875	0.5665	1.0129	1.264	1.4593					1.4593
Barbus meridionalis	T9	16-May-2012	127	36.3	5	12	21	31	41	45	49				49	0.3991	0.6502	0.9292	1.2082	1.3198	1.4314				1.4314
Barbus meridionalis	T9	16-May-2012	114	25.7	2	8	25	36							36	0.2875	0.7618	1.0687							1.0687
Barbus meridionalis	T9	16-May-2012	130	36.3	4	8	16	26	35	40					40	0.2875	0.5107	0.7897	1.0408	1.1803					1.1803
Barbus meridionalis	T9	16-May-2012	127	34.2	3	9	19	31	40						40	0.3154	0.5944	0.9292	1.1803						1.1803
Barbus meridionalis	T9	16-May-2012	139	49.1	5	9	15	22	28	36	43				43	0.3154	0.4828	0.6781	0.8455	1.0687	1.264				1.264
Barbus meridionalis	T9	16-May-2012	94	15.6	2	15	24	28							28	0.4828	0.7339	0.8455							0.8455
Barbus meridionalis	T9	16-May-2012	126	35.6	4	10	19	25	29	33					33	0.3433	0.5944	0.7618	0.8734	0.985					0.985
Barbus meridionalis	T9	16-May-2012	127	38.1	3	7	12	36	42						42	0.2596	0.3991	1.0687	1.2361						1.2361
Barbus meridionalis	T9	16-May-2012	110	24.6	4	8	12	21	25	33					33	0.2875	0.3991	0.6502	0.7618	0.985					0.985
Barbus meridionalis	T9	16-May-2012	110	23.3	3	8	17	22	30						30	0.2875	0.5386	0.6781	0.9013						0.9013
Barbus meridionalis	T9	16-May-2012	94	14.3	4	9	16	21	29	35					35	0.3154	0.5107	0.6502	0.8734	1.0408					1.0408
Barbus meridionalis	T9	16-May-2012	120	29.5	5	10	16	21	28	34	40				40	0.3433	0.5107	0.6502	0.8455	1.0129	1.1803				1.1803
Barbus meridionalis	T9	16-May-2012	122	37.2	4	10	16	22	29	34					34	0.3433	0.5107	0.6781	0.8734	1.0129					1.0129
Barbus meridionalis	T9	16-May-2012	112	29.1	3	9	19	33	41						41	0.3154	0.5944	0.985	1.2082						1.2082
Barbus meridionalis	T9	16-May-2012	92	13.2	2	9	19	24							24	0.3154	0.5944	0.7339							0.7339
Barbus meridionalis	T9	16-May-2012	84	11.2	2	7	15	17							17	0.2596	0.4828	0.5386							0.5386
Barbus meridionalis	T9	16-May-2012	90	12.4	3	7	15	25	29						29	0.2596	0.4828	0.7618	0.8734						0.8734
Barbus meridionalis	T9	16-May-2012	164	72.4	5	9	19	30	45	55	60				60	0.3154	0.5944	0.9013	1.3198	1.5988	1.7383				1.7383
Barbus meridionalis	T9	16-May-2012	94	13.9	2	9	20	23							23	0.3154	0.6223	0.706							0.706
Barbus meridionalis	T9	16-May-2012	128	40.2	4	11	20	22	32	34					34	0.3712	0.6223	0.6781	0.9571	1.0129					1.0129
Barbus meridionalis	T9	16-May-2012	136	47.7	3	8	23	31	35						35	0.2875	0.706	0.9292	1.0408						1.0408
Barbus meridionalis	T9	16-May-2012	129	39.9	3	10	21	29	35						35	0.3433	0.6502	0.8734	1.0408						1.0408
Barbus meridionalis	T9	16-May-2012	148	58.1	4	10	18	24	32	44					44	0.3433	0.5665	0.7339	0.9571	1.2919					1.2919
Barbus meridionalis	T9	16-May-2012	93	12.3	2	9	18	20							20	0.3154	0.5665	0.6223							0.6223
Barbus meridionalis	T9	16-May-2012	138	40.4	3	9	17	31	35						35	0.3154	0.5386	0.9292	1.0408						1.0408
Barbus meridionalis	T9	16-May-2012	108	19.8	2	9	19	24							24	0.3154	0.5944	0.7339							0.7339
Barbus meridionalis	T9	16-May-2012	98	16.2	3	6	12	20	25						25	0.2317	0.3991	0.6223	0.7618						0.7618
Barbus meridionalis	T9	16-May-2012	106	23.1	3	11	17	25	31						31	0.3712	0.5386	0.7618	0.9292						0.9292
Barbus meridionalis	T9	16-May-2012	101	19.5	3	8	17	28	31						31	0.2875	0.5386	0.8455	0.9292						0.9292
Barbus meridionalis	T9	16-May-2012	183	99.5	5	9	16	25	33	40	43				43	0.3154	0.5107	0.7618	0.985	1.1803	1.264				1.264
Barbus meridionalis	T9	16-May-2012	146	56.6	5	8	14	19	29	34	38				38	0.2875	0.4549	0.5944	0.8734	1.0129	1.1245				1.1245
Barbus meridionalis	T9	16-May-2012	96	16.2	3	9	16	22	27						27	0.3154	0.5107	0.6781	0.8176						0.8176
Barbus meridionalis	T9	16-May-2012	89	10.1	2	8	18	22							22	0.2875	0.5665	0.6781							0.6781
Barbus meridionalis	T9	16-May-2012	94	12.4	3	9	14	21	26						26	0.3154	0.4549	0.6502	0.7897						0.7897
Barbus meridionalis	T9	16-May-2012	154	76.2	3	13	34	45	48						48	0.427	1.0129	1.3198	1.4035						1.4035
Barbus meridionalis	T9	16-May-2012	142	53.7	3	10	24	44	48						48	0.3433	0.7339	1.2919	1.4035						1.4035
Barbus meridionalis	T9	16-May-2012	92	12.5	2	7	18	23							23	0.2596	0.5665	0.706							0.706
Barbus meridionalis	T9	16-May-2012	111	27.6	3	12	18	23	28						28	0.3991	0.5665	0.706	0.8455						0.8455
Barbus meridionalis	T9	16-May-2012	93	12.9	3	9	16	23	27						27	0.3154	0.5107	0.706	0.8176						0.8176
Barbus meridionalis	T9	16-May-2012	152	61.5	2	16	40	45							45	0.5107	1.1803	1.3198							1.3198
Barbus meridionalis	T9	16-May-2012	114	25.1	2	11	23	27							27	0.3712	0.706	0.8176							0.8176
Barbus meridionalis	T9	16-May-2012	109	21.5	2	14	25	32							32	0.4549	0.7618	0.9571							0.9571
Barbus meridionalis	T9	16-May-2012	119	28.2	4	10	19	29	34	36					36	0.3433	0.5944	0.8734	1.0129	1.0687					1.0687
Barbus meridionalis	T9	16-May-2012	128	39.5	5	10	21	26	31	37	41				41	0.3433	0.6502	0.7897	0.9292	1.0966	1.2082				1.2082
Barbus meridionalis	T9	16-May-2012	136	50.3	3	13	29	38	41						41	0.427	0.8734	1.1245	1.2082						1.2082
Barbus meridionalis	T9	16-May-2012	93	15.2	3	10	16	22	24						24	0.3433	0.5107	0.6781	0.7339						0.7339
Barbus meridionalis	T9	5-Jun-2012	152	64.5	4	11	20	30	43	46					46	0.3712	0.6223	0.9013	1.264	1.3477					1.3477
Barbus meridionalis	T9	5-Jun-2012	127	40.1	2	13	39	51							51	0.427	1.1524	1.4872							1.4872
Barbus meridionalis	T9	5-Jun-2012	161	71.2	5	9	16	24	38	46	49				49	0.3154	0.5107	0.7339	1.1245	1.3477	1.4314				1.4314
Barbus meridionalis	T9	5-Jun-2012	126	32.6	2	9	32	46							46	0.3154	0.9571	1.3477							1.3477
Barbus meridionalis	T9	5-Jun-2012	129	48.4	3	8	20	33	42						42	0.2875	0.6223	0.985	1.2361						1.2361
Barbus meridionalis	T9	5-Jun-2012	133	45.6	3	21	35	50	54						54	0.6502	1.0408	1.4593	1.5709						1.5709
Barbus meridionalis	T9	5-Jun-2012	122	30.1	2	9	29	43							43	0.3154	0.8734	1.264							1.264
Barbus meridionalis	T9	5-Jun-2012	120	28.4	4	11	19	29	32	43					43	0.3712	0.5944	0.8734	0.9571	1.264					1.264
Barbus meridionalis	T9	5-Jun-2012	92	12.4	3	5	19	28	31						31	0.2038	0.5944	0.8455	0.9292						0.9292
Barbus meridionalis	T9	5-Jun-2012	203	159.4	5	12	35	43	56	62	65				65	0.3991	1.0408	1.264	1.6267	1.7941	1.8778				1.8778
Barbus meridionalis	T9	5-Jun-2012	126	34.1	3	10	23	33	45						45	0.3433	0.706	0.985	1.3198						1.3198
Barbus meridionalis	T9	5-Jun-2012	90	13.5	3	6	14	24	29						29	0.2317	0.4549	0.7339	0.8734						0.8734
Barbus meridionalis	T9	5-Jun-2012	117	26.3	3	8	20	28	37						37	0.2875	0.6223	0.8455	1.0966						1.0966
Barbus meridionalis	T9	5-Jun-2012	134	43.3	4	11	20	25	41	50					50	0.3712	0.6223	0.7618	1.2082	1.4593					1.4593
Barbus meridionalis	T9	5-Jun-2012	131	34	3	11	25	38	49						49	0.3712	0.7618	1.1245	1.4314						1.4314
Barbus meridionalis	T9	5-Jun-2012	168	83.4	3	10	38	58	64						64	0.3433	1.1245	1.6825	1.8499						1.8499
Barbus meridionalis	T9	5-Jun-2012	152	58.9	3	10	38	51	58						58	0.3433	1.1245	1.4872	1.6825						1.6825
Barbus meridionalis	T9	5-Jun-2012	111	27.9	2	6	28	40							40	0.2317	0.8455	1.1803							1.1803
Barbus meridionalis	T9	5-Jun-2012	153	56.6	4	9	26	37	51	56					56	0.3154	0.7897	1.0966	1.4872	1.6267					1.6267
Barbus meridionalis	T9	5-Jun-2012	143	54.4	3	12	32	50	55						55	0.3991	0.9571	1.4593	1.5988						1.5988
Barbus meridionalis	T9	5-Jun-2012	189	115.2	5	10	21	27	41	51	54				54	0.3433	0.6502	0.8176	1.2082	1.4872	1.5709				1.5709
Barbus meridionalis	T9	5-Jun-2012	149	54.4	3	14	20	43	52						52	0.4549	0.6223	1.264	1.5151						1.5151
Barbus meridionalis	T9	5-Jun-2012	107	24.8	2	17	27	38							38	0.5386	0.8176	1.1245							1.1245
Barbus meridionalis	T9	5-Jun-2012	126	34.4	3	9	20	37	52						52	0.3154	0.6223	1.0966	1.5151						1.5151
Barbus meridionalis	T9	5-Jun-2012	120	31.7	2	10	30	41							41	0.3433	0.9013	1.2082							1.2082
Barbus meridionalis	T9	5-Jun-2012	151	50.6	3	10	30	53	55						55	0.3433	0.9013	1.543	1.5988						1.5988
Barbus meridionalis	T9	5-Jun-2012	97	15.6	2	10	25	33							33	0.3433	0.7618	0.985							0.985
Barbus meridionalis	T9	5-Jun-2012	75	7.2	1	14	23								23	0.4549	0.706								0.706
Barbus meridionalis	T9	5-Jun-2012	123	36.8	2	12	35	50							50	0.3991	1.0408	1.4593							1.4593
Barbus meridionalis	T9	5-Jun-2012	111	26.9	3	10	22	32	47						47	0.3433	0.6781	0.9571	1.3756						1.3756
Barbus meridionalis	T9	5-Jun-2012	147	56.1	2	12	42	45							45	0.3991	1.2361	1.3198							1.3198
Barbus meridionalis	T9	5-Jun-2012	82	10.5	1	15	25								25	0.4828	0.7618								0.7618
Barbus meridionalis	T9	5-Jun-2012	180	93.9	4	8	19	33	66	74					74	0.2875	0.5944	0.985	1.9057	2.1289					2.1289
Barbus meridionalis	T9	5-Jun-2012	217	166.3	6	9	19	40	49	65	70	72			72	0.3154	0.5944	1.1803	1.4314	1.8778	2.0173	2.0731			2.0731
Barbus meridionalis	T9	5-Jun-2012	130	37.4	3	11	33	45	49						49	0.3712	0.985	1.3198	1.4314						1.4314
Barbus meridionalis	T9	5-Jun-2012	121	36.4	3	10	24	38	50						50	0.3433	0.7339	1.1245	1.4593						1.4593
Barbus meridionalis	T9	5-Jun-2012	173	83.5	4	10	29	42	49	53					53	0.3433	0.8734	1.2361	1.4314	1.543					1.543
Barbus meridionalis	T9	5-Jun-2012	104	21.5	2	15	26	36							36	0.4828	0.7897	1.0687							1.0687
Barbus meridionalis	T9	5-Jun-2012	116	28.7	2	10	27	41							41	0.3433	0.8176	1.2082							1.2082
Barbus meridionalis	T9	5-Jun-2012	131	37	3	8	25	34	43						43	0.2875	0.7618	1.0129	1.264						1.264
Barbus meridionalis	T9	5-Jun-2012	131	44.8	3	7	28	40	52						52	0.2596	0.8455	1.1803	1.5151						1.5151
Barbus meridionalis	T9	5-Jun-2012	161	74.7	5	8	18	30	47	58	63				63	0.2875	0.5665	0.9013	1.3756	1.6825	1.822				1.822
Barbus meridionalis	T9	5-Jun-2012	104	24.7	2	9	26	39							39	0.3154	0.7897	1.1524							1.1524
Barbus meridionalis	T9	5-Jun-2012	111	24	2	11	25	36							36	0.3712	0.7618	1.0687							1.0687
Barbus meridionalis	T9	5-Jun-2012	167	73.6	4	12	25	27	56	57					57	0.3991	0.7618	0.8176	1.6267	1.6546					1.6546
Barbus meridionalis	T9	5-Jun-2012	71	6	1	9	21								21	0.3154	0.6502								0.6502
Barbus meridionalis	T9	5-Jun-2012	140	46.4	3	10	36	48	53						53	0.3433	1.0687	1.4035	1.543						1.543
Barbus meridionalis	T9	5-Jun-2012	104	18.5	3	7	25	33	35						35	0.2596	0.7618	0.985	1.0408						1.0408
Barbus meridionalis	T9	5-Jun-2012	81	8.7	1	12	21								21	0.3991	0.6502								0.6502
Barbus meridionalis	T9	5-Jun-2012	118	21.5	2	9	23	27							27	0.3154	0.706	0.8176							0.8176
Barbus meridionalis	T9	5-Jun-2012	108	18.1	3	8	21	31	34						34	0.2875	0.6502	0.9292	1.0129						1.0129
Barbus meridionalis	T9	5-Jun-2012	142	47.8	3	19	24	43	45						45	0.5944	0.7339	1.264	1.3198						1.3198
Barbus meridionalis	T9	5-Jun-2012	134	43.6	3	7	22	34	44						44	0.2596	0.6781	1.0129	1.2919						1.2919
Barbus meridionalis	T9	5-Jun-2012	123	34	2	13	24	34							34	0.427	0.7339	1.0129							1.0129
Barbus meridionalis	T9	5-Jun-2012	122	30.6	2	14	29	42							42	0.4549	0.8734	1.2361							1.2361
Barbus meridionalis	T9	5-Jun-2012	142	53	4	9	20	35	42	45					45	0.3154	0.6223	1.0408	1.2361	1.3198					1.3198
Barbus meridionalis	T9	5-Jun-2012	122	29.7	3	8	15	31	47						47	0.2875	0.4828	0.9292	1.3756						1.3756
Barbus meridionalis	T9	5-Jun-2012	101	16.9	4	10	15	21	31	34					34	0.3433	0.4828	0.6502	0.9292	1.0129					1.0129
Barbus meridionalis	T9	5-Jun-2012	94	15.4	3	8	23	31	35						35	0.2875	0.706	0.9292	1.0408						1.0408
Barbus meridionalis	T9	5-Jun-2012	110	22	3	10	21	40	45						45	0.3433	0.6502	1.1803	1.3198						1.3198
Barbus meridionalis	T9	5-Jun-2012	95	16.5	3	8	21	28	32						32	0.2875	0.6502	0.8455	0.9571						0.9571
Barbus meridionalis	T9	5-Jun-2012	117	27.4	3	8	17	29	36						36	0.2875	0.5386	0.8734	1.0687						1.0687
Barbus meridionalis	T9	5-Jun-2012	143	51	3	14	35	47	53						53	0.4549	1.0408	1.3756	1.543						1.543
Barbus meridionalis	T9	5-Jun-2012	74	8	1	13	24								24	0.427	0.7339								0.7339
Barbus meridionalis	T9	5-Jun-2012	74	5.9	1	10	18								18	0.3433	0.5665								0.5665
Barbus meridionalis	T9	5-Jun-2012	88	11.8	2	8	19	29							29	0.2875	0.5944	0.8734							0.8734
Barbus meridionalis	T9	5-Jun-2012	112	25	3	11	24	36	40						40	0.3712	0.7339	1.0687	1.1803						1.1803
Barbus meridionalis	T9	5-Jun-2012	125	45.2	2	7	35	48							48	0.2596	1.0408	1.4035							1.4035
Barbus meridionalis	T9	5-Jun-2012	122	35	2	14	26	36							36	0.4549	0.7897	1.0687							1.0687
Barbus meridionalis	T9	5-Jun-2012	73	6.3	1	11	21								21	0.3712	0.6502								0.6502
Barbus meridionalis	T9	11-Oct-2013	112	20.5	2	16	26	47							47	0.5107	0.7897	1.3756							1.3756
Barbus meridionalis	T9	11-Oct-2013	127	30.6	6	11	16	27	36	42	52	59			59	0.3712	0.5107	0.8176	1.0687	1.2361	1.5151	1.7104			1.7104
Barbus meridionalis	T9	11-Oct-2013	128	33	4	11	22	47	62	70					70	0.3712	0.6781	1.3756	1.7941	2.0173					2.0173
Barbus meridionalis	T9	11-Oct-2013	130	34.2	5	21	32	38	47	64	72				72	0.6502	0.9571	1.1245	1.3756	1.8499	2.0731				2.0731
Barbus meridionalis	T9	11-Oct-2013	124	28	6	8	22	28	38	43	51	54			54	0.2875	0.6781	0.8455	1.1245	1.264	1.4872	1.5709			1.5709
Barbus meridionalis	T9	11-Oct-2013	209	146.2	6	15	35	46	64	71	97	111			111	0.4828	1.0408	1.3477	1.8499	2.0452	2.7706	3.1612			3.1612
Barbus meridionalis	T9	11-Oct-2013	150	65.4	4	10	21	41	74	77					77	0.3433	0.6502	1.2082	2.1289	2.2126					2.2126
Barbus meridionalis	T9	11-Oct-2013	120	26.4	4	14	33	45	58	62					62	0.4549	0.985	1.3198	1.6825	1.7941					1.7941
Barbus meridionalis	T9	11-Oct-2013	111	26.3	5	12	25	35	41	48	59				59	0.3991	0.7618	1.0408	1.2082	1.4035	1.7104				1.7104
Barbus meridionalis	T9	11-Oct-2013	133	38.9	5	10	25	43	51	64	67				67	0.3433	0.7618	1.264	1.4872	1.8499	1.9336				1.9336
Barbus meridionalis	T9	11-Oct-2013	140	37.5	4	12	26	54	68	74					74	0.3991	0.7897	1.5709	1.9615	2.1289					2.1289
Barbus meridionalis	T9	11-Oct-2013	73	5.8	1	11	33								33	0.3712	0.985								0.985
Barbus meridionalis	T9	11-Oct-2013	134	36.2	3	12	32	41	46						46	0.3991	0.9571	1.2082	1.3477						1.3477
Barbus meridionalis	T9	11-Oct-2013	167	70.7	5	10	21	33	47	69	76				76	0.3433	0.6502	0.985	1.3756	1.9894	2.1847				2.1847
Barbus meridionalis	T9	11-Oct-2013	122	30.8	5	7	12	25	41	45	47				47	0.2596	0.3991	0.7618	1.2082	1.3198	1.3756				1.3756
Barbus meridionalis	T9	11-Oct-2013	121	27.8	5	8	16	26	32	40	45				45	0.2875	0.5107	0.7897	0.9571	1.1803	1.3198				1.3198
Barbus meridionalis	T9	11-Oct-2013	113	19.9	4	7	14	22	28	39					39	0.2596	0.4549	0.6781	0.8455	1.1524					1.1524
Barbus meridionalis	T10	11-Oct-2013	224	185	6	9	18	40	54	69	75	82			82	0.3154	0.5665	1.1803	1.5709	1.9894	2.1568	2.3521			2.3521
Barbus meridionalis	T10	11-Oct-2013	164	60.5	5	12	29	43	54	59	64				64	0.3991	0.8734	1.264	1.5709	1.7104	1.8499				1.8499
Barbus meridionalis	T10	11-Oct-2013	87	11.2	2	9	16	24							24	0.3154	0.5107	0.7339							0.7339
Barbus meridionalis	T10	11-Oct-2013	123	27.7	5	8	18	31	39	43	47				47	0.2875	0.5665	0.9292	1.1524	1.264	1.3756				1.3756
Barbus meridionalis	T10	11-Oct-2013	91	11	2	11	28	32							32	0.3712	0.8455	0.9571							0.9571
Barbus meridionalis	T10	11-Oct-2013	53	2	0	15									15	0.4828									0.4828
Barbus meridionalis	T10	11-Oct-2013	122	30.8	6	13	27	36	42	47	55	59			59	0.427	0.8176	1.0687	1.2361	1.3756	1.5988	1.7104			1.7104
Barbus meridionalis	T10	11-Oct-2013	129	29.4	4	12	29	44	51	63					63	0.3991	0.8734	1.2919	1.4872	1.822					1.822
Barbus meridionalis	T10	11-Oct-2013	114	21.9	5	9	16	28	40	46	51				51	0.3154	0.5107	0.8455	1.1803	1.3477	1.4872				1.4872
Barbus meridionalis	T10	11-Oct-2013	104	14.7	5	8	13	20	30	35	44				44	0.2875	0.427	0.6223	0.9013	1.0408	1.2919				1.2919
Barbus meridionalis	T10	11-Oct-2013	109	17.7	5	9	16	39	44	47	53				53	0.3154	0.5107	1.1524	1.2919	1.3756	1.543				1.543
Barbus meridionalis	T10	11-Oct-2013	91	11	3	9	26	35	38						38	0.3154	0.7897	1.0408	1.1245						1.1245
Barbus meridionalis	T10	11-Oct-2013	85	9.5	2	11	24	33							33	0.3712	0.7339	0.985							0.985
Barbus meridionalis	T10	11-Oct-2013	53	2	1	9	15								15	0.3154	0.4828								0.4828
Barbus meridionalis	T10	11-Oct-2013	53	2	1	8	13								13	0.2875	0.427								0.427
Barbus meridionalis	T11	9-Oct-2013	196	116	8	10	17	35	44	54	61	66	76	84	84	0.3433	0.5386	1.0408	1.2919	1.5709	1.7662	1.9057	2.1847	2.4079	2.4079
Barbus meridionalis	T11	9-Oct-2013	172	82	6	10	23	32	44	53	59	64			64	0.3433	0.706	0.9571	1.2919	1.543	1.7104	1.8499			1.8499
Barbus meridionalis	T11	9-Oct-2013	153	46	5	8	21	28	33	42	52				52	0.2875	0.6502	0.8455	0.985	1.2361	1.5151				1.5151
Barbus meridionalis	T11	9-Oct-2013	155	56.6	5	16	42	50	60	68	80				80	0.5107	1.2361	1.4593	1.7383	1.9615	2.2963				2.2963
Barbus meridionalis	T11	9-Oct-2013	130	28.6	6	10	18	26	38	43	47	52			52	0.3433	0.5665	0.7897	1.1245	1.264	1.3756	1.5151			1.5151
Barbus meridionalis	T11	9-Oct-2013	32	0.2	0	7									7	0.2596									0.2596
Barbus meridionalis	T11	9-Oct-2013	35	0.7	0	9									9	0.3154									0.3154
Barbus meridionalis	T11	9-Oct-2013	36	0.2	0	9									9	0.3154									0.3154
Barbus meridionalis	T11	9-Oct-2013	45	1.1	1	10	15								15	0.3433	0.4828								0.4828
Barbus meridionalis	T11	9-Oct-2013	49	1.2	1	10	12								12	0.3433	0.3991								0.3991
Barbus meridionalis	T11	9-Oct-2013	44	1.2	1	9	13								13	0.3154	0.427								0.427
Barbus meridionalis	T11	9-Oct-2013	46	1.2	1	8	13								13	0.2875	0.427								0.427
Barbus meridionalis	T11	9-Oct-2013	78	6.1	2	9	23	27							27	0.3154	0.706	0.8176							0.8176
Barbus meridionalis	T11	9-Oct-2013	101	14	2	10	28	35							35	0.3433	0.8455	1.0408							1.0408
Barbus meridionalis	T11	9-Oct-2013	83	7.3	2	13	22	25							25	0.427	0.6781	0.7618							0.7618
Barbus meridionalis	T11	9-Oct-2013	45	1.2	1	11	16								16	0.3712	0.5107								0.5107
Barbus meridionalis	T11	9-Oct-2013	77	8.6	2	8	18	23							23	0.2875	0.5665	0.706							0.706
Barbus meridionalis	T11	9-Oct-2013	58	2.4	1	9	16								16	0.3154	0.5107								0.5107
Barbus meridionalis	T11	9-Oct-2013	63	2.9	2	10	21	26							26	0.3433	0.6502	0.7897							0.7897
Barbus meridionalis	T12	9-Oct-2013	142	42.8	4	6	17	23	48	64					64	0.2317	0.5386	0.706	1.4035	1.8499					1.8499
Barbus meridionalis	T12	9-Oct-2013	113	21.2	3	9	25	35	37						37	0.3154	0.7618	1.0408	1.0966						1.0966
Barbus meridionalis	T12	9-Oct-2013	96	12.8	3	9	17	29	31						31	0.3154	0.5386	0.8734	0.9292						0.9292
Barbus meridionalis	T12	9-Oct-2013	54	3	1	10	14								14	0.3433	0.4549								0.4549
Barbus meridionalis	T12	9-Oct-2013	60	3.5	1	13	18								18	0.427	0.5665								0.5665
Barbus meridionalis	T12	9-Oct-2013	48	1.6	1	11	15								15	0.3712	0.4828								0.4828
Barbus meridionalis	T12	9-Oct-2013	59	3.9	1	12	18								18	0.3991	0.5665								0.5665
Barbus meridionalis	T12	9-Oct-2013	54	1.8	1	10	13								13	0.3433	0.427								0.427
Barbus meridionalis	T12	9-Oct-2013	54	2.7	1	13	18								18	0.427	0.5665								0.5665
Barbus meridionalis	T12	9-Oct-2013	48	1.9	1	9	14								14	0.3154	0.4549								0.4549
Barbus meridionalis	T12	9-Oct-2013	136	40.6	5	8	13	24	37	56	60				60	0.2875	0.427	0.7339	1.0966	1.6267	1.7383				1.7383
Barbus meridionalis	T12	9-Oct-2013	56	3.2	1	9	14								14	0.3154	0.4549								0.4549
Barbus meridionalis	T12	9-Oct-2013	52	2.1	1	11	16								16	0.3712	0.5107								0.5107
Barbus meridionalis	T12	9-Oct-2013	130	36.6	3	9	27	38	44						44	0.3154	0.8176	1.1245	1.2919						1.2919
Barbus meridionalis	T12	9-Oct-2013	97	13.5	3	9	24	41	47						47	0.3154	0.7339	1.2082	1.3756						1.3756
Barbus meridionalis	A1	9-Oct-2013	118	18.5	3	7	24	45	53						53	0.2596	0.7339	1.3198	1.543						1.543
Barbus meridionalis	A1	9-Oct-2013	125	25.5	4	12	21	29	42	48					48	0.3991	0.6502	0.8734	1.2361	1.4035					1.4035
Barbus meridionalis	A1	9-Oct-2013	147	42	3	11	37	64	68						68	0.3712	1.0966	1.8499	1.9615						1.9615
Barbus meridionalis	A1	9-Oct-2013	109	21.3	3	9	22	55	71						71	0.3154	0.6781	1.5988	2.0452						2.0452
Barbus meridionalis	A1	9-Oct-2013	84	8.4	3	8	19	25	27						27	0.2875	0.5944	0.7618	0.8176						0.8176
Barbus meridionalis	A1	9-Oct-2013	146	36.8	2	8	15	17							17	0.2875	0.4828	0.5386							0.5386
Barbus meridionalis	A1	9-Oct-2013	134	36	4	8	28	36	54	59					59	0.2875	0.8455	1.0687	1.5709	1.7104					1.7104
Barbus meridionalis	A1	9-Oct-2013	112	15.9	2	11	36	42							42	0.3712	1.0687	1.2361							1.2361
Barbus meridionalis	A2	31-May-2012	94	13.5	2	10	20	25							25	0.3433	0.6223	0.7618							0.7618
Barbus meridionalis	A2	31-May-2012	108	22.8	3	7	17	30	33						33	0.2596	0.5386	0.9013	0.985						0.985
Barbus meridionalis	A2	31-May-2012	86	9.1	3	7	12	19	22						22	0.2596	0.3991	0.5944	0.6781						0.6781
Barbus meridionalis	A2	31-May-2012		16.2	2	13	24	31							31	0.427	0.7339	0.9292							0.9292
Barbus meridionalis	A2	31-May-2012	76	7.9	1	13	19								19	0.427	0.5944								0.5944
Barbus meridionalis	A2	31-May-2012	76	6.7	2	6	16	21							21	0.2317	0.5107	0.6502							0.6502
Barbus meridionalis	A2	31-May-2012	73	6	2	6	16	18							18	0.2317	0.5107	0.5665							0.5665
Barbus meridionalis	A2	31-May-2012	78	7.3	2	5	18	21							21	0.2038	0.5665	0.6502							0.6502
Barbus meridionalis	A2	31-May-2012	136	39.6	2	13	26	34							34	0.427	0.7897	1.0129							1.0129
Barbus meridionalis	A2	31-May-2012	145	39.9	4	10	22	30	37	40					40	0.3433	0.6781	0.9013	1.0966	1.1803					1.1803
Barbus meridionalis	A2	31-May-2012	81	9	2	7	13	20							20	0.2596	0.427	0.6223							0.6223
Barbus meridionalis	A2	31-May-2012	99	19.4	1	17	21								21	0.5386	0.6502								0.6502
Barbus meridionalis	A2	31-May-2012	79	9.6	2	13	21	26							26	0.427	0.6502	0.7897							0.7897
Barbus meridionalis	A2	31-May-2012	91	13.3	2	10	19	25							25	0.3433	0.5944	0.7618							0.7618
Barbus meridionalis	A2	31-May-2012	73	6.5	2	7	15	19							19	0.2596	0.4828	0.5944							0.5944
Barbus meridionalis	A2	31-May-2012	93	14.1	2	14	27	33							33	0.4549	0.8176	0.985							0.985
Barbus meridionalis	A2	31-May-2012	99	16.9	3	10	19	28	30						30	0.3433	0.5944	0.8455	0.9013						0.9013
Barbus meridionalis	A2	31-May-2012	99	18.7	2	12	23	30							30	0.3991	0.706	0.9013							0.9013
Barbus meridionalis	A2	31-May-2012	113	24.8	2	17	28	30							30	0.5386	0.8455	0.9013							0.9013
Barbus meridionalis	A2	31-May-2012	107	17.4	5	7	12	16	20	28	30				30	0.2596	0.3991	0.5107	0.6223	0.8455	0.9013				0.9013
Barbus meridionalis	A2	31-May-2012	83	9.5	2	13	22	25							25	0.427	0.6781	0.7618							0.7618
Barbus meridionalis	A2	31-May-2012	81	8.8	2	10	22	27							27	0.3433	0.6781	0.8176							0.8176
Barbus meridionalis	A2	31-May-2012	73	6	2	6	16	18							18	0.2317	0.5107	0.5665							0.5665
Barbus meridionalis	A2	31-May-2012	83	8.7	2	13	22	24							24	0.427	0.6781	0.7339							0.7339
Barbus meridionalis	A2	31-May-2012	97	13.5	3	5	14	20	25						25	0.2038	0.4549	0.6223	0.7618						0.7618
Barbus meridionalis	A2	31-May-2012	83	9.4	2	8	18	23							23	0.2875	0.5665	0.706							0.706
Barbus meridionalis	A2	31-May-2012	84	9.3	2	8	16	21							21	0.2875	0.5107	0.6502							0.6502
Barbus meridionalis	A2	31-May-2012	80	7.2	3	5	16	21	25						25	0.2038	0.5107	0.6502	0.7618						0.7618
Barbus meridionalis	A2	31-May-2012	88	8.2	2	5	21	25							25	0.2038	0.6502	0.7618							0.7618
Barbus meridionalis	A2	31-May-2012	78	7.1	2	10	20	22							22	0.3433	0.6223	0.6781							0.6781
Barbus meridionalis	A2	31-May-2012	168	73.7	4	11	25	35	44	47					47	0.3712	0.7618	1.0408	1.2919	1.3756					1.3756
Barbus meridionalis	A2	31-May-2012	113	26	3	7	19	32	35						35	0.2596	0.5944	0.9571	1.0408						1.0408
Barbus meridionalis	A2	31-May-2012	85	9.3	3	7	18	27	32						32	0.2596	0.5665	0.8176	0.9571						0.9571
Barbus meridionalis	A2	31-May-2012	106	18.8	2	15	28	32							32	0.4828	0.8455	0.9571							0.9571
Barbus meridionalis	A2	31-May-2012	102	20.1	2	12	19	25							25	0.3991	0.5944	0.7618							0.7618
Barbus meridionalis	A2	31-May-2012	114	26.5	3	9	20	30	34						34	0.3154	0.6223	0.9013	1.0129						1.0129
Barbus meridionalis	A2	31-May-2012	101	16	2	13	19	29							29	0.427	0.5944	0.8734							0.8734
Barbus meridionalis	A2	31-May-2012	157	56.4	4	17	33	40	46	48					48	0.5386	0.985	1.1803	1.3477	1.4035					1.4035
Barbus meridionalis	A2	31-May-2012	125	32	2	19	34	38							38	0.5944	1.0129	1.1245							1.1245
Barbus meridionalis	A2	31-May-2012	73	6	2	10	15	17							17	0.3433	0.4828	0.5386							0.5386
Barbus meridionalis	A2	31-May-2012	72	6.6	1	12	19								19	0.3991	0.5944								0.5944
Barbus meridionalis	A2	31-May-2012	114	22.8	6	7	13	18	23	31	41	42			42	0.2596	0.427	0.5665	0.706	0.9292	1.2082	1.2361			1.2361
Barbus meridionalis	A2	31-May-2012	84	9.8	3	5	18	25	28						28	0.2038	0.5665	0.7618	0.8455						0.8455
Barbus meridionalis	A2	31-May-2012	90	10.8	3	10	16	23	27						27	0.3433	0.5107	0.706	0.8176						0.8176
Barbus meridionalis	A2	31-May-2012	80	8.3	2	12	18	20							20	0.3991	0.5665	0.6223							0.6223
Barbus meridionalis	A2	31-May-2012	84	8.8	2	11	23	25							25	0.3712	0.706	0.7618							0.7618
Barbus meridionalis	A2	31-May-2012	78	7.4	2	13	18	20							20	0.427	0.5665	0.6223							0.6223
Barbus meridionalis	A2	31-May-2012	87	10	2	12	18	21							21	0.3991	0.5665	0.6502							0.6502
Barbus meridionalis	A2	31-May-2012	80	8.1	2	11	17	20							20	0.3712	0.5386	0.6223							0.6223
Barbus meridionalis	A2	31-May-2012	80	7.9	2	16	21	24							24	0.5107	0.6502	0.7339							0.7339
Barbus meridionalis	A2	31-May-2012	93	13.3	2	8	20	30							30	0.2875	0.6223	0.9013							0.9013
Barbus meridionalis	A2	31-May-2012	104	19	2	14	25	30							30	0.4549	0.7618	0.9013							0.9013
Barbus meridionalis	A2	31-May-2012	87	11.5	2	15	19	33							33	0.4828	0.5944	0.985							0.985
Barbus meridionalis	A2	31-May-2012	84	10	2	11	17	20							20	0.3712	0.5386	0.6223							0.6223
Barbus meridionalis	A2	31-May-2012	93	12.8	2	11	18	24							24	0.3712	0.5665	0.7339							0.7339
Barbus meridionalis	A2	31-May-2012	88	12.6	2	20	25	27							27	0.6223	0.7618	0.8176							0.8176
Barbus meridionalis	A2	31-May-2012	89	10.2	2	16	18	21							21	0.5107	0.5665	0.6502							0.6502
Barbus meridionalis	A2	31-May-2012	85	11	2	12	23	27							27	0.3991	0.706	0.8176							0.8176
Barbus meridionalis	A2	31-May-2012	88	10.3	2	16	23	26							26	0.5107	0.706	0.7897							0.7897
Barbus meridionalis	A2	31-May-2012	73	7.3	2	16	21	23							23	0.5107	0.6502	0.706							0.706
Barbus meridionalis	A2	31-May-2012	78	8.3	2	13	18	22							22	0.427	0.5665	0.6781							0.6781
Barbus meridionalis	A2	31-May-2012	83	9.1	2	12	16	22							12	0.3991	0.5107	0.6781							0.3991
Barbus meridionalis	A2	31-May-2012	88	10.9	2	15	23	28							28	0.4828	0.706	0.8455							0.8455
Barbus meridionalis	A2	31-May-2012	75	6	2	7	14	16							16	0.2596	0.4549	0.5107							0.5107
Barbus meridionalis	A2	5-Jun-2012	117	25.8	5	10	15	18	24	28	30				30	0.3433	0.4828	0.5665	0.7339	0.8455	0.9013				0.9013
Barbus meridionalis	A2	5-Jun-2012	103	17.7	2	10	20	28							28	0.3433	0.6223	0.8455							0.8455
Barbus meridionalis	A2	5-Jun-2012	100	19.5	2	4	15	19							19	0.1759	0.4828	0.5944							0.5944
Barbus meridionalis	A2	5-Jun-2012	119	23.2	2	12	20	30							30	0.3991	0.6223	0.9013							0.9013
Barbus meridionalis	A2	5-Jun-2012	101	13.3	2	13	26	35							35	0.427	0.7897	1.0408							1.0408
Barbus meridionalis	A2	5-Jun-2012	98	15.2	2	15	25	35							35	0.4828	0.7618	1.0408							1.0408
Barbus meridionalis	A2	5-Jun-2012	88	10.9	2	17	26	31							31	0.5386	0.7897	0.9292							0.9292
Barbus meridionalis	A2	5-Jun-2012	107	19.9	2	13	24	37							37	0.427	0.7339	1.0966							1.0966
Barbus meridionalis	A2	5-Jun-2012	116	27.1	2	14	25	28							28	0.4549	0.7618	0.8455							0.8455
Barbus meridionalis	A2	5-Jun-2012	102	15	2	16	27	32							32	0.5107	0.8176	0.9571							0.9571
Barbus meridionalis	A2	5-Jun-2012	111	18.9	2	12	20	29							29	0.3991	0.6223	0.8734							0.8734
Barbus meridionalis	A2	5-Jun-2012	80	8.7	3	15	22	27	31						31	0.4828	0.6781	0.8176	0.9292						0.9292
Barbus meridionalis	A2	5-Jun-2012	85	11.2	2	19	25	28							28	0.5944	0.7618	0.8455							0.8455
Barbus meridionalis	A2	5-Jun-2012	128	33.3	2	14	28	32							32	0.4549	0.8455	0.9571							0.9571
Barbus meridionalis	A2	5-Jun-2012	107	20.8	3	8	16	22	24						24	0.2875	0.5107	0.6781	0.7339						0.7339
Barbus meridionalis	A2	5-Jun-2012	92	12.4	3	8	22	31	34						34	0.2875	0.6781	0.9292	1.0129						1.0129
Barbus meridionalis	A2	5-Jun-2012	78	7	2	16	26	35							35	0.5107	0.7897	1.0408							1.0408
Barbus meridionalis	A2	5-Jun-2012	86	10.3	3	7	17	29	33						33	0.2596	0.5386	0.8734	0.985						0.985
Barbus meridionalis	A2	5-Jun-2012	76	6.8	2	14	19	20							20	0.4549	0.5944	0.6223							0.6223
Barbus meridionalis	A2	5-Jun-2012	112	23.4	3	10	13	20	28						28	0.3433	0.427	0.6223	0.8455						0.8455
Barbus meridionalis	A2	5-Jun-2012	73	7	3	10	23	33	34						34	0.3433	0.706	0.985	1.0129						1.0129
Barbus meridionalis	A2	5-Jun-2012	97	14.6	2	13	19	22							22	0.427	0.5944	0.6781							0.6781
Barbus meridionalis	A2	5-Jun-2012	71	6	2	10	17	21							21	0.3433	0.5386	0.6502							0.6502
Barbus meridionalis	A2	5-Jun-2012	97	15	2	7	15	25							25	0.2596	0.4828	0.7618							0.7618
Barbus meridionalis	A2	5-Jun-2012	89	12.8	3	8	16	28	29						29	0.2875	0.5107	0.8455	0.8734						0.8734
Barbus meridionalis	A2	5-Jun-2012	83	8.6	1	15	21								21	0.4828	0.6502								0.6502
Barbus meridionalis	A2	5-Jun-2012	102	20.8	2	15	24	32							32	0.4828	0.7339	0.9571							0.9571
Barbus meridionalis	A2	5-Jun-2012	112	19.9	2	12	26	30							30	0.3991	0.7897	0.9013							0.9013
Barbus meridionalis	A2	5-Jun-2012	95	14.8	4	9	13	17	30	36					38	0.3154	0.427	0.5386	0.9013	1.0687					1.1245
Barbus meridionalis	A2	5-Jun-2012	93	10.5	1	11	18								18	0.3712	0.5665								0.5665
Barbus meridionalis	A2	5-Jun-2012	97	15	2	12	23	30							30	0.3991	0.706	0.9013							0.9013
Barbus meridionalis	A2	5-Jun-2012	95	13	3	6	13	20	27						27	0.2317	0.427	0.6223	0.8176						0.8176
Barbus meridionalis	A2	5-Jun-2012	88	11.7	2	17	26	33							33	0.5386	0.7897	0.985							0.985
Barbus meridionalis	A2	5-Jun-2012	82	8.5	1	14	22								22	0.4549	0.6781								0.6781
Barbus meridionalis	A2	5-Jun-2012	87	10.6	2	15	23	32							32	0.4828	0.706	0.9571							0.9571
Barbus meridionalis	A2	5-Jun-2012	88	10.6	2	11	16	19							19	0.3712	0.5107	0.5944							0.5944
Barbus meridionalis	A2	5-Jun-2012	90	10.2	2	11	22	28							28	0.3712	0.6781	0.8455							0.8455
Barbus meridionalis	A2	5-Jun-2012	116	22.2	3	7	18	24	27						27	0.2596	0.5665	0.7339	0.8176						0.8176
Barbus meridionalis	A2	5-Jun-2012	90	10.8	4	8	22	27	30	31					31	0.2875	0.6781	0.8176	0.9013	0.9292					0.9292
Barbus meridionalis	A2	5-Jun-2012	93	12.6	2	7	24	27							27	0.2596	0.7339	0.8176							0.8176
Barbus meridionalis	A2	5-Jun-2012	105	16.8	2	15	20	24							24	0.4828	0.6223	0.7339							0.7339
Barbus meridionalis	A2	5-Jun-2012	102	16.2	2	6	17	25							25	0.2317	0.5386	0.7618							0.7618
Barbus meridionalis	A2	5-Jun-2012	96	13.2	2	7	16	20							20	0.2596	0.5107	0.6223							0.6223
Barbus meridionalis	A2	5-Jun-2012	87	10	2	14	17	18							18	0.4549	0.5386	0.5665							0.5665
Barbus meridionalis	A2	5-Jun-2012	86	10.4	2	9	15	22							22	0.3154	0.4828	0.6781							0.6781
Barbus meridionalis	A2	5-Jun-2012	103	18.1	3	7	16	18	20						20	0.2596	0.5107	0.5665	0.6223						0.6223
Barbus meridionalis	A2	5-Jun-2012	79	7.5	3	10	19	27	30						30	0.3433	0.5944	0.8176	0.9013						0.9013
Barbus meridionalis	A2	5-Jun-2012	74	6.1	3	6	16	20	22						22	0.2317	0.5107	0.6223	0.6781						0.6781
Barbus meridionalis	A2	5-Jun-2012	76	6.5	5	11	19	23	27	29	30				30	0.3712	0.5944	0.706	0.8176	0.8734	0.9013				0.9013
Barbus meridionalis	A2	5-Jun-2012	83	9.7	3	15	20	24	28						28	0.4828	0.6223	0.7339	0.8455						0.8455
Barbus meridionalis	A2	5-Jun-2012	74	6.6	4	9	15	21	24	25					25	0.3154	0.4828	0.6502	0.7339	0.7618					0.7618
Barbus meridionalis	A2	5-Jun-2012	87	8.5	3	5	14	24	27						27	0.2038	0.4549	0.7339	0.8176						0.8176
Barbus meridionalis	A2	5-Jun-2012	110	19.8	4	4	14	22	26	28					28	0.1759	0.4549	0.6781	0.7897	0.8455					0.8455
Barbus meridionalis	A2	5-Jun-2012	86	9.3	3	6	17	21	23						23	0.2317	0.5386	0.6502	0.706						0.706
Barbus meridionalis	A2	5-Jun-2012	73	5.6	3	6	14	19	21						21	0.2317	0.4549	0.5944	0.6502						0.6502
Barbus meridionalis	A2	5-Jun-2012	103	14.3	2	9	17	22							22	0.3154	0.5386	0.6781							0.6781
Barbus meridionalis	A2	5-Jun-2012	96	12.4	3	9	15	26	32						32	0.3154	0.4828	0.7897	0.9571						0.9571
Barbus meridionalis	A2	5-Jun-2012	90	11.3	3	5	14	18	20						20	0.2038	0.4549	0.5665	0.6223						0.6223
Barbus meridionalis	A2	5-Jun-2012	95	10.7	3	11	17	21	23						23	0.3712	0.5386	0.6502	0.706						0.706
Barbus meridionalis	A2	5-Jun-2012	71	4.9	2	8	15	21							21	0.2875	0.4828	0.6502							0.6502
Barbus meridionalis	A2	9-Oct-2013	95	12.1	3	5	22	28	30						30	0.2038	0.6781	0.8455	0.9013						0.9013
Barbus meridionalis	A2	9-Oct-2013	106	15.5	3	9	26	44	52						52	0.3154	0.7897	1.2919	1.5151						1.5151
Barbus meridionalis	A2	9-Oct-2013	131	25.2	4	14	24	32	54	60					60	0.4549	0.7339	0.9571	1.5709	1.7383					1.7383
Barbus meridionalis	A2	9-Oct-2013	113	16.9	3	9	25	43	45						45	0.3154	0.7618	1.264	1.3198						1.3198
Barbus meridionalis	A2	9-Oct-2013	105	15	3	13	32	39	50						50	0.427	0.9571	1.1524	1.4593						1.4593
Barbus meridionalis	A2	9-Oct-2013	118	18.6	3	12	27	42	51						51	0.3991	0.8176	1.2361	1.4872						1.4872
Barbus meridionalis	A2	9-Oct-2013	73	4.3	1	10	21								21	0.3433	0.6502								0.6502
Barbus meridionalis	A2	9-Oct-2013	105	11.3	5	7	19	25	31	34	37				37	0.2596	0.5944	0.7618	0.9292	1.0129	1.0966				1.0966
Barbus meridionalis	A2	9-Oct-2013	67	2.9	1	9	22								22	0.3154	0.6781								0.6781
Barbus meridionalis	A2	9-Oct-2013	91	8	2	8	19	31							31	0.2875	0.5944	0.9292							0.9292
Barbus meridionalis	A2	9-Oct-2013	87	6.3	2	9	22	29							29	0.3154	0.6781	0.8734							0.8734
Barbus meridionalis	A2	9-Oct-2013	95	9.7	3	8	19	24	29						29	0.2875	0.5944	0.7339	0.8734						0.8734
Barbus meridionalis	A2	9-Oct-2013	67	3.1	1	9	23								23	0.3154	0.706								0.706
Barbus meridionalis	A2	9-Oct-2013	89	7.7	2	14	31	35							35	0.4549	0.9292	1.0408							1.0408
Barbus meridionalis	A2	9-Oct-2013	80	5.2	1	9	27								27	0.3154	0.8176								0.8176
Barbus meridionalis	A2	9-Oct-2013	81	4.2	1	11	27								27	0.3712	0.8176								0.8176
Barbus meridionalis	A2	9-Oct-2013	61	2.4	1	8	19								19	0.2875	0.5944								0.5944
Barbus meridionalis	A2	9-Oct-2013	93	7.7	2	7	18	26							26	0.2596	0.5665	0.7897							0.7897
Barbus meridionalis	A2	9-Oct-2013	69	3.6	2	7	20	28							28	0.2596	0.6223	0.8455							0.8455
Barbus meridionalis	A2	9-Oct-2013	59	2.1	1	8	24								24	0.2875	0.7339								0.7339
Barbus meridionalis	A2	9-Oct-2013	115	16.3	4	9	16	29	33	36					36	0.3154	0.5107	0.8734	0.985	1.0687					1.0687
Barbus meridionalis	A2	9-Oct-2013	139	30.1	5	10	26	41	48	57	61				61	0.3433	0.7897	1.2082	1.4035	1.6546	1.7662				1.7662
Barbus meridionalis	A2	9-Oct-2013	112	15.4	4	7	16	25	31	38					38	0.2596	0.5107	0.7618	0.9292	1.1245					1.1245
Barbus meridionalis	A3	9-Oct-2013	106	15.3	3	9	21	35	38						38	0.3154	0.6502	1.0408	1.1245						1.1245
Barbus meridionalis	A3	9-Oct-2013	63	4.8	2	11	20	24							24	0.3712	0.6223	0.7339							0.7339
Barbus meridionalis	A3	9-Oct-2013	65	5.1	1	10	16								16	0.3433	0.5107								0.5107
Barbus meridionalis	A3	9-Oct-2013	73	6.2	2	7	20	27							27	0.2596	0.6223	0.8176							0.8176
Barbus meridionalis	A3	9-Oct-2013	97	18.5	2	9	19	33							33	0.3154	0.5944	0.985							0.985
Barbus meridionalis	A3	9-Oct-2013	96	17.9	3	10	30	47	53						53	0.3433	0.9013	1.3756	1.543						1.543
Barbus meridionalis	A3	9-Oct-2013	75	5.9	3	8	17	21	25						25	0.2875	0.5386	0.6502	0.7618						0.7618
Barbus meridionalis	A3	9-Oct-2013	82	9.1	2	11	21	31							31	0.3712	0.6502	0.9292							0.9292
Barbus meridionalis	A3	9-Oct-2013	64	7.5	1	7	18								18	0.2596	0.5665								0.5665
Squalius laietanus	T8	2012-05-08	167	73.1	4	2	4.5	6	7						7	0.1201	0.18985	0.2317	0.2596						0.2596
Squalius laietanus	T8	2012-05-08	110	23.4	2	1	3.5	4							4	0.0922	0.16195	0.1759							0.1759
Squalius laietanus	T8	2012-05-08	146	35.9	3	1	2	4.5	6						6	0.0922	0.1201	0.18985	0.2317						0.2317
Squalius laietanus	T8	2012-05-08	161	75.8	3	0.5	3	6	7						7	0.07825	0.148	0.2317	0.2596						0.2596
Squalius laietanus	T8	2012-05-08	147	57.9	3	0.5	2.5	5	5.5						5.5	0.07825	0.13405	0.2038	0.21775						0.21775
Squalius laietanus	T8	2012-05-08	170	73.3	3	1	4	7	8						8	0.0922	0.1759	0.2596	0.2875						0.2875
Squalius laietanus	T8	2012-05-08	182	110.8	3	1	4.5	7.5	8						8	0.0922	0.18985	0.27355	0.2875						0.2875
Squalius laietanus	T8	2012-05-08	127	35	2	1.5	5	5.5							5.5	0.10615	0.2038	0.21775							0.21775
Squalius laietanus	T8	2012-05-08	241	255	5	0.5	3	6.5	8.5	10.5					10.5	0.07825	0.148	0.24565	0.30145	0.35725					0.35725
Squalius laietanus	T8	2012-05-08	200	152.1	4	1.5	4	6.5	9.5	10					10	0.10615	0.1759	0.24565	0.32935	0.3433					0.3433
Squalius laietanus	T8	2012-05-08	121	26.2	2	0.5	3	3.5							3.5	0.07825	0.148	0.16195							0.16195
Squalius laietanus	T8	2012-05-08	141	40.7	3	1	4	5							5	0.0922	0.1759	0.2038							0.2038
Squalius laietanus	T8	2012-05-08	171	74.7	2	1	3.5	5.5							5.5	0.0922	0.16195	0.21775							0.21775
Squalius laietanus	T8	2012-05-08	192	134.8	3	1	4.5	8	9						9	0.0922	0.18985	0.2875	0.3154						0.3154
Squalius laietanus	T8	2012-05-08	129	36.2	2	1	4	4.5							4.5	0.0922	0.1759	0.18985							0.18985
Squalius laietanus	T8	2012-05-08	179	104	4	0.5	2	4	7	7.5					7.5	0.07825	0.1201	0.1759	0.2596	0.27355					0.27355
Squalius laietanus	T8	2012-05-08	181	97.1	4	1	3.5	4.5	7.5	8					8	0.0922	0.16195	0.18985	0.27355	0.2875					0.2875
Squalius laietanus	T8	2012-05-08	213	145.5	4	0.5	3.5	6	8	9					9	0.07825	0.16195	0.2317	0.2875	0.3154					0.3154
Squalius laietanus	T8	2012-05-08	177	97	3	1	3	7	7.5						7.5	0.0922	0.148	0.2596	0.27355						0.27355
Squalius laietanus	T8	2012-05-08	240	221.3	4	0.5	3.5	6.5	9.5	10					10	0.07825	0.16195	0.24565	0.32935	0.3433					0.3433
Squalius laietanus	T8	2012-05-08	162	65.2	2	1	4	7							7	0.0922	0.1759	0.2596							0.2596
Squalius laietanus	T8	2012-05-08	143	42.8	3	1	3.5	5	5.5						5.5	0.0922	0.16195	0.2038	0.21775						0.21775
Squalius laietanus	T8	2012-05-08	121	28.7	2	1	4	5							5	0.0922	0.1759	0.2038							0.2038
Squalius laietanus	T8	2012-05-08	143	44.5	2	1	5	6							6	0.0922	0.2038	0.2317							0.2317
Squalius laietanus	T8	2012-05-08	112	20.4	2	0.5	3.5	4							4	0.07825	0.16195	0.1759							0.1759
Squalius laietanus	T8	2012-05-08	166	73.5	3	0.5	3.5	4.5	5.5						5	0.07825	0.16195	0.18985	0.21775						0.2038
Squalius laietanus	T8	2012-05-08	175	87.1	3	1	3	5.5	6						6	0.0922	0.148	0.21775	0.2317						0.2317
Squalius laietanus	T8	2012-05-08	180	105	3	1	4.5	8	9.5						9.5	0.0922	0.18985	0.2875	0.32935						0.32935
Squalius laietanus	T8	2012-05-08	130	35	2	1.5	4.5	5							5	0.10615	0.18985	0.2038							0.2038
Squalius laietanus	T8	2012-05-08	223	181.5	5	1.5	4	6	8.5	10.5	11				11	0.10615	0.1759	0.2317	0.30145	0.35725	0.3712				0.3712
Squalius laietanus	T8	2012-05-08	222	157.6	5	1	3.5	5	6	8.5	10				10	0.0922	0.16195	0.2038	0.2317	0.30145	0.3433				0.3433
Squalius laietanus	T8	2012-05-08	238	219.9	4	1	4.5	8	9.5	11.5					11.5	0.0922	0.18985	0.2875	0.32935	0.38515					0.38515
Squalius laietanus	T8	2012-05-08	106	18.2	2	0.5	3	4							4	0.07825	0.148	0.1759							0.1759
Squalius laietanus	T8	2012-05-08	106	18.2	2	0.5	2.5	3							3	0.07825	0.13405	0.148							0.148
Squalius laietanus	T8	2012-05-08	221	180	4	0.5	3	6	9	10					10	0.07825	0.148	0.2317	0.3154	0.3433					0.3433
Squalius laietanus	T8	2012-05-08	239	252.9	6	0.5	4	5.5	6.5	9	10	10.5			10.5	0.07825	0.1759	0.21775	0.24565	0.3154	0.3433	0.35725			0.35725
Squalius laietanus	T8	2012-05-08	182	95.9	5	1	3	5	7	7.5	8				8	0.0922	0.148	0.2038	0.2596	0.27355	0.2875				0.2875
Squalius laietanus	T8	2012-05-08	90	10.5	2	0.5	2.5	3							3	0.07825	0.13405	0.148							0.148
Squalius laietanus	T8	2012-05-09	193	110	4	0.5	3	5	6.5	7					7	0.07825	0.148	0.2038	0.24565	0.2596					0.2596
Squalius laietanus	T8	2012-05-09	164	56.7	3	1	4	5.5	6						6	0.0922	0.1759	0.21775	0.2317						0.2317
Squalius laietanus	T8	2012-05-09	227	196.5	5	0.5	2	5	8	10	11				11	0.07825	0.1201	0.2038	0.2875	0.3433	0.3712				0.3712
Squalius laietanus	T8	2012-05-09	119	25	2	0.5	3	4							4	0.07825	0.148	0.1759							0.1759
Squalius laietanus	T8	2012-05-09	190	112.6	5	1	4	6	7.5	8	8.5				8.5	0.0922	0.1759	0.2317	0.27355	0.2875	0.30145				0.30145
Squalius laietanus	T8	2012-05-09	129	34.2	2	1	4	5							5	0.0922	0.1759	0.2038							0.2038
Squalius laietanus	T8	2012-05-09	203	120.3	5	1	2	4.5	6.5	8	9				9	0.0922	0.1201	0.18985	0.24565	0.2875	0.3154				0.3154
Squalius laietanus	T8	2012-05-09	175	80.3	5	1.5	2.5	5.5	6.5	7					7	0.10615	0.13405	0.21775	0.24565	0.2596					0.2596
Squalius laietanus	T8	2012-05-09	154	58.2	3	0.5	3	5	5.5						5.5	0.07825	0.148	0.2038	0.21775						0.21775
Squalius laietanus	T8	2012-05-09	152	51.3	3	0.5	2.5	4.5	5						5	0.07825	0.13405	0.18985	0.2038						0.2038
Squalius laietanus	T8	2012-05-09	175	89	3	0.5	3.5	6.5	7						7	0.07825	0.16195	0.24565	0.2596						0.2596
Squalius laietanus	T8	2012-05-09	173	87	4	1	2.5	4	7	7.5					7.5	0.0922	0.13405	0.1759	0.2596	0.27355					0.27355
Squalius laietanus	T8	2012-05-09	155	57.7	3	0.5	4	5.5	6						6	0.07825	0.1759	0.21775	0.2317						0.2317
Squalius laietanus	T8	2012-05-09	192	115.2	4	1.5	4.5	6	8	8.5					8.5	0.10615	0.18985	0.2317	0.2875	0.30145					0.30145
Squalius laietanus	T8	2012-05-09	196	122.1	4	0.5	2	4.5	6.5	7.5					7.5	0.07825	0.1201	0.18985	0.24565	0.27355					0.27355
Squalius laietanus	T8	2012-05-09	179	95	3	1	3.5	7.5	8						8	0.0922	0.16195	0.27355	0.2875						0.2875
Squalius laietanus	T8	2012-05-09	137	38.3	3	1	5	5.5							5.5	0.0922	0.2038	0.21775							0.21775
Squalius laietanus	T8	2012-05-09	94	12	2	0.5	2.5	3							3	0.07825	0.13405	0.148							0.148
Squalius laietanus	T8	2012-05-09	204	136.7	5	0.5	2.5	5	7.5	8.5	9				9	0.07825	0.13405	0.2038	0.27355	0.30145	0.3154				0.3154
Squalius laietanus	T8	2012-05-09	202	148.5	4	1	3.5	5.5	8.5	9					9	0.0922	0.16195	0.21775	0.30145	0.3154					0.3154
Squalius laietanus	T8	2012-05-09	228	206.1	5	1.5	4	5	7	7.5	8				8	0.10615	0.1759	0.2038	0.2596	0.27355	0.2875				0.2875
Squalius laietanus	T8	2012-05-09	170	88.8	5	0.5	2	3.5	6	6.5	7				7	0.07825	0.1201	0.16195	0.2317	0.24565	0.2596				0.2596
Squalius laietanus	T8	2012-05-09	166	81.9	3	1	4	8	8.5						8.5	0.0922	0.1759	0.2875	0.30145						0.30145
Squalius laietanus	T8	2012-05-09	125	30.6	2	1	4	5							5	0.0922	0.1759	0.2038							0.2038
Squalius laietanus	T8	2012-05-09	140	40.5	3	0.5	2	4.5	5						5	0.07825	0.1201	0.18985	0.2038						0.2038
Squalius laietanus	T8	2012-05-09	172	75.4	3	1.5	4.5	6.5	7						7	0.10615	0.18985	0.24565	0.2596						0.2596
Squalius laietanus	T8	2012-05-09	137	39.5	2	1	4.5	5							5	0.0922	0.18985	0.2038							0.2038
Squalius laietanus	T8	2012-05-09	210	154.4	5	1	4	6.5	7	9	9.5				9.5	0.0922	0.1759	0.24565	0.2596	0.3154	0.32935				0.32935
Squalius laietanus	T8	2012-05-09	182	105.3	4	1	2	3.5	5	6					6	0.0922	0.1201	0.16195	0.2038	0.2317					0.2317
Squalius laietanus	T8	2012-05-09	167	66.3	3	0.5	3.5	6.5	7						7	0.07825	0.16195	0.24565	0.2596						0.2596
Squalius laietanus	T8	2012-05-09	47	1.2	2	1	2.5	4							4	0.0922	0.13405	0.1759							0.1759
Squalius laietanus	T8	2012-05-09	239	212.2	5	0.5	2	5.5	7.5	9.5	11.5				11.5	0.07825	0.1201	0.21775	0.27355	0.32935	0.38515				0.38515
Squalius laietanus	T8	2012-05-09	284	372.3	6	1	3.5	8.5	10.5	11.5	15	16			16	0.0922	0.16195	0.30145	0.35725	0.38515	0.4828	0.5107			0.5107
Squalius laietanus	T8	2012-05-09	233	218.9	6	0.5	3	7	11	13	13.5				13.5	0.07825	0.148	0.2596	0.3712	0.427	0.44095				0.44095
Squalius laietanus	T8	2012-05-09	205	144.9	5	1	2.5	4.5	6.5	8.5	9				9	0.0922	0.13405	0.18985	0.24565	0.30145	0.3154				0.3154
Squalius laietanus	T8	2012-05-09	142	46.2	3	1	4	5.5	6						6	0.0922	0.1759	0.21775	0.2317						0.2317
Squalius laietanus	T8	2012-05-09	87	9.2	1	2	2.5								2.5	0.1201	0.13405								0.13405
Squalius laietanus	T8	2012-05-09	86	9.4	1	1	2								2	0.0922	0.1201								0.1201
Squalius laietanus	T8	2012-05-09	120	27.1	2	0.5	4	4.5							4.5	0.07825	0.1759	0.18985							0.18985
Squalius laietanus	T4	2012-05-11	156	51.3	3	0.5	2	6	7						7	0.07825	0.1201	0.2317	0.2596						0.2596
Squalius laietanus	T9	2012-05-16	150	55.2	3	1	4.5	6.5	7						7	0.0922	0.18985	0.24565	0.2596						0.2596
Squalius laietanus	T9	2012-05-16	270	323.8	5	2	4.5	6.5	8.5	11	14.5				14.5	0.1201	0.18985	0.24565	0.30145	0.3712	0.46885				0.46885
Squalius laietanus	T9	2012-05-16	151	62	3	1	3.5	6	6.5						6.5	0.0922	0.16195	0.2317	0.24565						0.24565
Squalius laietanus	T9	2012-05-16	160	66.1	3	1	5	7	7.5						7.5	0.0922	0.2038	0.2596	0.27355						0.27355
Squalius laietanus	T9	2012-05-16	132	33.9	3	1	3.5	5	5.5						5.5	0.0922	0.16195	0.2038	0.21775						0.21775
Squalius laietanus	T9	2012-05-16	132	45.2	3	1	4.5	6	7						7	0.0922	0.18985	0.2317	0.2596						0.2596
Squalius laietanus	T9	2012-05-16	176	94.7	3	1.5	5	7	7.5						7.5	0.10615	0.2038	0.2596	0.27355						0.27355
Squalius laietanus	T9	2012-05-16	137	45.8	4	0.5	2	4	5.5	6					6	0.07825	0.1201	0.1759	0.21775	0.2317					0.2317
Squalius laietanus	T9	2012-05-16	243	236.2	5	1	3	5	6	12	13.5				13.5	0.0922	0.148	0.2038	0.2317	0.3991	0.44095				0.44095
Squalius laietanus	T9	2012-05-16	116	24.5	3	0.5	3	4	4.5						4.5	0.07825	0.148	0.1759	0.18985						0.18985
Squalius laietanus	T9	2012-05-16	144	47.3	2	0.5	3.5	6.5							6.5	0.07825	0.16195	0.24565							0.24565
Squalius laietanus	T9	2012-05-16	116	25.5	2	1	3.5	4							4	0.0922	0.16195	0.1759							0.1759
Squalius laietanus	T9	2012-05-16	167	70.9	3	1	4	6.5	7						7	0.0922	0.1759	0.24565	0.2596						0.2596
Squalius laietanus	T9	2012-05-16	139	45.4	3	0.5	2.5	5	6						6	0.07825	0.13405	0.2038	0.2317						0.2317
Squalius laietanus	T9	2012-05-16	97	16.1	2	0.5	2.5	3							3	0.07825	0.13405	0.148							0.148
Squalius laietanus	T9	2012-05-16	165	62.6	3	1	2	5	7						7	0.0922	0.1201	0.2038	0.2596						0.2596
Squalius laietanus	T9	2012-05-16	147	49.5	2	1	4	5							5	0.0922	0.1759	0.2038							0.2038
Squalius laietanus	T9	2012-05-16	150	52.5	3	1.5	4	5.5	6						6	0.10615	0.1759	0.21775	0.2317						0.2317
Squalius laietanus	T9	2012-05-16	126	32.7	3	0.5	3	5	5.5						5.5	0.07825	0.148	0.2038	0.21775						0.21775
Squalius laietanus	T9	2012-05-16	136	40.7	2	1	4	5.5							5.5	0.0922	0.1759	0.21775							0.21775
Squalius laietanus	T9	2012-05-16	146	51.4	4	1	2.5	4	6	6.5					6.5	0.0922	0.13405	0.1759	0.2317	0.24565					0.24565
Squalius laietanus	T9	2012-05-16	162	61.2	3	1	3	5.5	6						6	0.0922	0.148	0.21775	0.2317						0.2317
Squalius laietanus	T9	2012-05-16	167	81.6	3	1	4	6.5	8						8	0.0922	0.1759	0.24565	0.2875						0.2875
Squalius laietanus	T9	2012-05-16	149	54.1	3	1	4.5	6	6.5						6.5	0.0922	0.18985	0.2317	0.24565						0.24565
Squalius laietanus	T9	2012-05-16	112	24.3	2	0.5	2.5	3.5							3.5	0.07825	0.13405	0.16195							0.16195
Squalius laietanus	T9	2012-05-16	145	49.2	3	1	3	5.5	6						6	0.0922	0.148	0.21775	0.2317						0.2317
Squalius laietanus	T9	2012-05-16	137	37	3	0.5	2.5	6	6.5						6.5	0.07825	0.13405	0.2317	0.24565						0.24565
Squalius laietanus	T9	2012-05-16	138	39	2	0.5	3	5							5	0.07825	0.148	0.2038							0.2038
Squalius laietanus	T9	2012-05-16	162	71.6	4	1	2.5	4	5	7					7	0.0922	0.13405	0.1759	0.2038	0.2596					0.2596
Squalius laietanus	T9	2012-05-16	94	12.4	1	2.5	3								3	0.13405	0.148								0.148
Squalius laietanus	T9	2012-05-16	120	27.6	3	0.5	2.5	4	4.5						4.5	0.07825	0.13405	0.1759	0.18985						0.18985
Squalius laietanus	T9	2012-05-16	116	25.7	3	1	4	5.5	6						6	0.0922	0.1759	0.21775	0.2317						0.2317
Squalius laietanus	T9	2012-05-16	145	51.1	3	0.5	4	6.5	7						7	0.07825	0.1759	0.24565	0.2596						0.2596
Squalius laietanus	T9	2012-05-16	142	46.8	3	0.5	3	4	4.5						4.5	0.07825	0.148	0.1759	0.18985						0.18985
Squalius laietanus	T9	2012-05-16	185	105.6	4	1.5	4	5.5	7	7.5					7.5	0.10615	0.1759	0.21775	0.2596	0.27355					0.27355
Squalius laietanus	T9	2012-05-16	135	38.4	3	0.5	3	4.5	5						5	0.07825	0.148	0.18985	0.2038						0.2038
Squalius laietanus	T9	2012-05-16		205.2	4	1.5	5.5	8	9	11.5					11.5	0.10615	0.21775	0.2875	0.3154	0.38515					0.38515
Squalius laietanus	T9	2012-05-16	155	61.8	2	1	4.5	5							5	0.0922	0.18985	0.2038							0.2038
Squalius laietanus	T9	2012-05-16	157	59.7	3	1	3.5	5	5.5						5.5	0.0922	0.16195	0.2038	0.21775						0.21775
Squalius laietanus	T9	2012-05-16	162	67.8	3	1	3.5	4.5	5.5						5.5	0.0922	0.16195	0.18985	0.21775						0.21775
Squalius laietanus	T9	2012-05-16	140	43	2	0.5	2	4.5	5.5						5.5	0.07825	0.1201	0.18985	0.21775						0.21775
Squalius laietanus	T9	2012-05-16	174	81.8	3	0.5	3	4	6.5	7.5					7.5	0.07825	0.148	0.1759	0.24565	0.27355					0.27355
Squalius laietanus	T9	2012-05-16	133	37.9	2	0.5	2	6							6	0.07825	0.1201	0.2317							0.2317
Squalius laietanus	T9	2012-05-16	132	36.9	3	0.5	2	3.5	4.5						4.5	0.07825	0.1201	0.16195	0.18985						0.18985
Squalius laietanus	T9	2012-05-16	142	42.5	3	1.5	3.5	4.5	5.5						5.5	0.10615	0.16195	0.18985	0.21775						0.21775
Squalius laietanus	T9	2012-05-16	127	34.2	2	0.5	2.5	4							4	0.07825	0.13405	0.1759							0.1759
Squalius laietanus	T9	2012-05-16	122	35.4	3	0.5	2.5	4.5	5						5	0.07825	0.13405	0.18985	0.2038						0.2038
Squalius laietanus	T9	2012-05-16	144	40.1	4	1	2.5	4	5	6					6	0.0922	0.13405	0.1759	0.2038	0.2317					0.2317
Squalius laietanus	T9	2012-05-16	141	45.3	2	1	3.5	5.5							5.5	0.0922	0.16195	0.21775							0.21775
Squalius laietanus	T9	2012-05-16	138	56.4	3	1	4	6	6.5						6.5	0.0922	0.1759	0.2317	0.24565						0.24565
Squalius laietanus	T9	2012-05-16	108	19.2	2	0.5	3	3.5							3.5	0.07825	0.148	0.16195							0.16195
Squalius laietanus	T9	2012-05-16	112	24.8	2	1	3	4.5							4.5	0.0922	0.148	0.18985							0.18985
Squalius laietanus	T9	2012-05-16	115	25.2	3	0.5	2	4	4.5						4.5	0.07825	0.1201	0.1759	0.18985						0.18985
Squalius laietanus	T9	2012-05-16	151	54.1	3	1	2.5	4.5	6						6	0.0922	0.13405	0.18985	0.2317						0.2317
Squalius laietanus	T9	2012-05-16	154	62.7	3	1.5	4.5	6.5	7						7	0.10615	0.18985	0.24565	0.2596						0.2596
Squalius laietanus	T9	2012-05-16	144	52.1	2	1	4.5	5							5	0.0922	0.18985	0.2038							0.2038
Squalius laietanus	T9	2012-05-16	156	68.5	4	1.5	3.5	4.5	5.5	6					6	0.10615	0.16195	0.18985	0.21775	0.2317					0.2317
Squalius laietanus	T9	2012-05-16		208.8	5	1	2.5	4.5	8	10	10.5				10.5	0.0922	0.13405	0.18985	0.2875	0.3433	0.35725				0.35725
Squalius laietanus	T9	2012-05-16	142	44.6	3	0.5	2.5	4	4.5						4.5	0.07825	0.13405	0.1759	0.18985						0.18985
Squalius laietanus	T9	2012-05-16	151	62	2	1	4.5	6							6	0.0922	0.18985	0.2317							0.2317
Squalius laietanus	T9	2012-05-16	170	81.2	3	1	3	5	6						6	0.0922	0.148	0.2038	0.2317						0.2317
Squalius laietanus	T9	2012-05-16	227	199.5	3	1	4	8	11						11	0.0922	0.1759	0.2875	0.3712						0.3712
Squalius laietanus	T9	2012-05-16	156	69.5	3	1.5	5	7	7.5						7.5	0.10615	0.2038	0.2596	0.27355						0.27355
Squalius laietanus	T9	2012-05-16	164	74.6	4	1	3.5	4.5	6	7					7	0.0922	0.16195	0.18985	0.2317	0.2596					0.2596
Squalius laietanus	T9	2012-05-16	146	48.5	2	1	4	5							5	0.0922	0.1759	0.2038							0.2038
Squalius laietanus	T9	2012-05-16	104	16.3	1	2	3								3	0.1201	0.148								0.148
Squalius laietanus	T9	2012-05-16	202	127.2	3	2	6	8	9.5						9.5	0.1201	0.2317	0.2875	0.32935						0.32935
Squalius laietanus	T9	2012-05-16	117	28.5	3	0.5	2	3	4						4	0.07825	0.1201	0.148	0.1759						0.1759
Squalius laietanus	T9	2012-05-16	120	30.4	3	0.5	2	4	5						5	0.07825	0.1201	0.1759	0.2038						0.2038
Squalius laietanus	T9	2012-05-16	167	81.5	3	1	4	6.5	7						7	0.0922	0.1759	0.24565	0.2596						0.2596
Squalius laietanus	T9	2012-05-16	153	66.1	3	1	4	6.5	7						7	0.0922	0.1759	0.24565	0.2596						0.2596
Squalius laietanus	T9	2012-05-16	193	114.5	4	2	5	6	7	7.5					7.5	0.1201	0.2038	0.2317	0.2596	0.27355					0.27355
Squalius laietanus	T9	2012-05-16	201	122.2	3	1.5	4.5	8	9.5						9.5	0.10615	0.18985	0.2875	0.32935						0.32935
Squalius laietanus	T9	2012-05-16	92	11.2	2	0.5	2.5	3							3	0.07825	0.13405	0.148							0.148
Squalius laietanus	T9	2012-05-16	97	17.3	1	2	3								3	0.1201	0.148								0.148
Squalius laietanus	T9	2012-05-16	172	85.9	3	1	3.5	7.5	8						8	0.0922	0.16195	0.27355	0.2875						0.2875
Squalius laietanus	T9	2012-05-16	106	18.5	2	0.5	3	3.5							3.5	0.07825	0.148	0.16195							0.16195
Squalius laietanus	T9	2012-05-16	125	33.1	2	1	2.5	5							5	0.0922	0.13405	0.2038							0.2038
Squalius laietanus	T9	2012-05-16	182	94.8	3	1	2	5	7	7.5					7.5	0.0922	0.1201	0.2038	0.2596	0.27355					0.27355
Squalius laietanus	T9	2012-05-16	160	62.6	3	1	3	5	6						6	0.0922	0.148	0.2038	0.2317						0.2317
Squalius laietanus	T9	2012-05-16	162	71.4	3	1	3	7	8						8	0.0922	0.148	0.2596	0.2875						0.2875
Squalius laietanus	T9	2012-05-16	118	23.4	2	0.5	2.5	3							3	0.07825	0.13405	0.148							0.148
Squalius laietanus	T9	2012-05-16	91	10	1	1.5	2.5								2.5	0.10615	0.13405								0.13405
Squalius laietanus	T9	2012-05-16	125	29.6	2	1	4	4.5							4.5	0.0922	0.1759	0.18985							0.18985
Squalius laietanus	T9	2012-05-16	85	10.6	1	2.5	3								3	0.13405	0.148								0.148
Squalius laietanus	T9	2012-05-16	209	154.9	3	1	4.5	9.5	10						10	0.0922	0.18985	0.32935	0.3433						0.3433
Squalius laietanus	T9	2012-05-16	131	36.9	3	1	3	5	5.5						5.5	0.0922	0.148	0.2038	0.21775						0.21775
Squalius laietanus	T9	2012-05-16	174	85.8	3
Squalius laietanus	T9	2012-05-16	127	31.8	3	1	3	6	6.5						6.5	0.0922	0.148	0.2317	0.24565						0.24565
Squalius laietanus	T9	2012-05-16		178.8	5	1	2.5	4	8	9	9.5				9.5	0.0922	0.13405	0.1759	0.2875	0.3154	0.32935				0.32935
Squalius laietanus	T9	2012-05-16	154	53.8	3	1	3	5.5	6						6	0.0922	0.148	0.21775	0.2317						0.2317
Squalius laietanus	T9	2012-05-16	156	61	4	1	3	4.5	6	6.5					6.5	0.0922	0.148	0.18985	0.2317	0.24565					0.24565
Squalius laietanus	T9	2012-05-16	154	57	3	1	3	5.5	6						6	0.0922	0.148	0.21775	0.2317						0.2317
Squalius laietanus	T9	2012-05-16	222	187.4	3	1.5	4.5	8	10	10.5					10.5	0.10615	0.18985	0.2875	0.3433	0.35725					0.35725
Squalius laietanus	T9	2012-05-16	227	281.3	4	1.5	6.5	11	14	14.5					14.5	0.10615	0.24565	0.3712	0.4549	0.46885					0.46885
Squalius laietanus	T9	2012-05-16	156	58.5	3	1	3	4	5						5	0.0922	0.148	0.1759	0.2038						0.2038
Squalius laietanus	T9	2012-05-16	171	77.7	2	1	3.5	5							5	0.0922	0.16195	0.2038							0.2038
Squalius laietanus	T9	2012-05-16	173	82.8	3	1	4	6	7						7	0.0922	0.1759	0.2317	0.2596						0.2596
Squalius laietanus	T9	2012-05-16	155	61	3	0.5	3	6.5	7						7	0.07825	0.148	0.24565	0.2596						0.2596
Squalius laietanus	T9	2012-05-16	218	176	4	1.5	3.5	7	8	11.5					11.5	0.10615	0.16195	0.2596	0.2875	0.38515					0.38515
Squalius laietanus	T9	2012-05-16	120	35.8	2	2	5	5.5							5.5	0.1201	0.2038	0.21775							0.21775
Squalius laietanus	T9	2012-05-16	84	9.4	2	0.5	2.5	3							3	0.07825	0.13405	0.148							0.148
Squalius laietanus	T9	2012-05-16	101	16.8	2	1	3	3.5							3.5	0.0922	0.148	0.16195							0.16195
Squalius laietanus	T9	2012-05-16	137	40.3	2	1.5	4	4.5							4.5	0.10615	0.1759	0.18985							0.18985
Squalius laietanus	T9	2012-05-16	147	50.1	4	1	3	5	6	6.5					6.5	0.0922	0.148	0.2038	0.2317	0.24565					0.24565
Squalius laietanus	T9	2012-05-16	136	36.5	3	0.5	2	5	6						6	0.07825	0.1201	0.2038	0.2317						0.2317
Squalius laietanus	T9	2012-05-16	130	31.7	3	1	3.5	4	4.5						4.5	0.0922	0.16195	0.1759	0.18985						0.18985
Squalius laietanus	T9	2012-05-16	176	80	3	0.5	3	4.5	6.5						6.5	0.07825	0.148	0.18985	0.24565						0.24565
Squalius laietanus	T9	2012-05-16	176	77.5	4	1.5	3	5	8	9					9	0.10615	0.148	0.2038	0.2875	0.3154					0.3154
Squalius laietanus	T9	2012-05-16	168	71.5	3	2	4	5.5	7						7	0.1201	0.1759	0.21775	0.2596						0.2596
Squalius laietanus	T9	2012-05-16	189	97.1	3	1	4.5	8.5	9						9	0.0922	0.18985	0.30145	0.3154						0.3154
Squalius laietanus	T9	2012-05-16	169	75.1	3	0.5	3	5	6						6	0.07825	0.148	0.2038	0.2317						0.2317
Squalius laietanus	T9	2012-05-16	194	118.1	4	2	4	5.5	8	8.5					8.5	0.1201	0.1759	0.21775	0.2875	0.30145					0.30145
Squalius laietanus	T9	2012-05-16	168	75.5	3	1	4	6.5	7						7	0.0922	0.1759	0.24565	0.2596						0.2596
Squalius laietanus	T9	2012-05-16	144	76.6	3	1.5	4	6	6.5						6.5	0.10615	0.1759	0.2317	0.24565						0.24565
Squalius laietanus	T9	2012-05-16	102	15.8	1	2	2.5								2.5	0.1201	0.13405								0.13405
Squalius laietanus	T9	2012-05-16	138	36.8	2	1	3.5	4.5							4.5	0.0922	0.16195	0.18985							0.18985
Squalius laietanus	T9	2012-05-16	202	138.9	5	1.5	4	5.5	7	9	9.5				9.5	0.10615	0.1759	0.21775	0.2596	0.3154	0.32935				0.32935
Squalius laietanus	T9	2012-05-16	186	95.5	3	1	3	7	8						8	0.0922	0.148	0.2596	0.2875						0.2875
Squalius laietanus	T9	2012-05-16	157	61.5	4	1	3	4.5	6	6.5					6.5	0.0922	0.148	0.18985	0.2317	0.24565					0.24565
Squalius laietanus	T9	2012-05-16	239	216.4	5	1.5	2.5	5	8.5	11	11.5				11.5	0.10615	0.13405	0.2038	0.30145	0.3712	0.38515				0.38515
Squalius laietanus	T7	2012-05-28	192	106.3	4	1	4.5	7.5	8.5	9					9	0.0922	0.18985	0.27355	0.30145	0.3154					0.3154
Squalius laietanus	T8	2012-05-29	194	115.1	4	1.5	3.5	5.5	8.5	9					9	0.10615	0.16195	0.21775	0.30145	0.3154					0.3154
Squalius laietanus	T8	2012-05-29	178	71.4	4	0.5	2	4.5	6	6.5					6.5	0.07825	0.1201	0.18985	0.2317	0.24565					0.24565
Squalius laietanus	T8	2012-05-29	196	111.9	5	0.5	2	4.5	6	7.5	8				8	0.07825	0.1201	0.18985	0.2317	0.27355	0.2875				0.2875
Squalius laietanus	T8	2012-05-29	165	63.4	4	1	3	4.5	6	6.5					6.5	0.0922	0.148	0.18985	0.2317	0.24565					0.24565
Squalius laietanus	T8	2012-05-29	213	177	5	0.5	2.5	5.5	8	9.5	10				10	0.07825	0.13405	0.21775	0.2875	0.32935	0.3433				0.3433
Squalius laietanus	T8	2012-05-29	125	31.4	2	1	3	5							5	0.0922	0.148	0.2038							0.2038
Squalius laietanus	T8	2012-05-29	197	113.3	3	1	3.5	7	7.5						7.5	0.0922	0.16195	0.2596	0.27355						0.27355
Squalius laietanus	T8	2012-05-29	260	267.9	6	1	4.5	6.5	8	10.5	11				11	0.0922	0.18985	0.24565	0.2875	0.35725	0.3712				0.3712
Squalius laietanus	T8	2012-05-29	264	287.6	5	1	4.5	8	11.5	14.5	15				15	0.0922	0.18985	0.2875	0.38515	0.46885	0.4828				0.4828
Squalius laietanus	T8	2012-05-29	134	38.7	2	1	4	5.5							5.5	0.0922	0.1759	0.21775							0.21775
Squalius laietanus	T8	2012-05-29	192	130.1	4	1.5	3	6	8	8.5					8.5	0.10615	0.148	0.2317	0.2875	0.30145					0.30145
Squalius laietanus	T8	2012-05-29	168	70.2	3	0.5	3	6	6.5						6.5	0.07825	0.148	0.2317	0.24565						0.24565
Squalius laietanus	T8	2012-05-29	180	90.4	3	1.5	4	7	7.5						7.5	0.10615	0.1759	0.2596	0.27355						0.27355
Squalius laietanus	T8	2012-05-29	137	34.7	2	1	4.5	5							5	0.0922	0.18985	0.2038							0.2038
Squalius laietanus	T8	2012-05-29	139	36.4	3	0.5	3.5	4.5	5						5	0.07825	0.16195	0.18985	0.2038						0.2038
Squalius laietanus	T8	2012-05-29	83	7.7	1	2	3								3	0.1201	0.148								0.148
Squalius laietanus	T8	2012-05-29	163	56	3	1	3.5	5	5.5						5.5	0.0922	0.16195	0.2038	0.21775						0.21775
Squalius laietanus	T8	2012-05-29	115	24.7	2	1	3	4.5							4.5	0.0922	0.148	0.18985							0.18985
Squalius laietanus	T8	2012-05-29	157	59.4	4	0.5	2	4	6	6.5					6.5	0.07825	0.1201	0.1759	0.2317	0.24565					0.24565
Squalius laietanus	T8	2012-05-29	120	24.6	3	1	2	3.5	4.5						4.5	0.0922	0.1201	0.16195	0.18985						0.18985
Squalius laietanus	T8	2012-05-29	91	8.7	2	0.5	2.5	3.5							3.5	0.07825	0.13405	0.16195							0.16195
Squalius laietanus	T2	2012-05-30	285	326.4	7	1	4.5	6	8	9.5	11	12.5	13.5		13.5	0.0922	0.18985	0.2317	0.2875	0.32935	0.3712	0.41305	0.44095		0.44095
Squalius laietanus	T2	2012-05-30	264	257.9	5	1.5	4.5	7	9	10.5	13.5				13.5	0.10615	0.18985	0.2596	0.3154	0.35725	0.44095				0.44095
Squalius laietanus	T9	2012-06-04	97	14.9	2	0.5	2	3							3	0.07825	0.1201	0.148							0.148
Squalius laietanus	T9	2012-06-04	72	5.6	1	1	2.5								2.5	0.0922	0.13405								0.13405
Squalius laietanus	T9	2012-06-04	172	71	3	0.5	2.5	4	5						5	0.07825	0.13405	0.1759	0.2038						0.2038
Squalius laietanus	T9	2012-06-04	176	91.7	4	0.5	1.5	4.5	6	6.5					6.5	0.07825	0.10615	0.18985	0.2317	0.24565					0.24565
Squalius laietanus	T9	2012-06-04	157	61.3	3	0.5	3	4.5	6						6	0.07825	0.148	0.18985	0.2317						0.2317
Squalius laietanus	T9	2012-06-04	145	46.7	3	1	3	4.5	5						5	0.0922	0.148	0.18985	0.2038						0.2038
Squalius laietanus	T9	2012-06-04	148	58.2	2	1	3.5	5							5	0.0922	0.16195	0.2038							0.2038
Squalius laietanus	T9	2012-06-04	121	30.7	2	0.5	2.5	4							4	0.07825	0.13405	0.1759							0.1759
Squalius laietanus	T9	2012-06-04	97	14.4	2	0.5	1.5	2.5							2.5	0.07825	0.10615	0.13405							0.13405
Squalius laietanus	T9	2012-06-04	220	174.7	5	1	3	5.5	7.5	9.5	10				10	0.0922	0.148	0.21775	0.27355	0.32935	0.3433				0.3433
Squalius laietanus	T9	2012-06-04	146	52.3	3	0.5	2	4	5						5	0.07825	0.1201	0.1759	0.2038						0.2038
Squalius laietanus	T9	2012-06-04	142	41.2	3	0.5	2.5	4	4.5						4.5	0.07825	0.13405	0.1759	0.18985						0.18985
Squalius laietanus	T9	2012-06-04	103	17	2	0.5	2	3							3	0.07825	0.1201	0.148							0.148
Squalius laietanus	T9	2012-06-04	106	21.1	2	0.5	2.5	3							3	0.07825	0.13405	0.148							0.148
Squalius laietanus	T9	2012-06-04	260	265	5	1	4.5	6.5	9	9.5					9.5	0.0922	0.18985	0.24565	0.3154	0.32935					0.32935
Squalius laietanus	T9	2012-06-04	84	9.3	1	1.5	3								3	0.10615	0.148								0.148
Squalius laietanus	T9	2012-06-04	136	42.3	3	0.5	3	4.5	5						5	0.07825	0.148	0.18985	0.2038						0.2038
Squalius laietanus	T9	2012-06-04	147	44.5	3	0.5	3.5	4.5							4.5	0.07825	0.16195	0.18985							0.18985
Squalius laietanus	T9	2012-06-04	189	112.6	3	1	2.5	3.5	4.5						4.5	0.0922	0.13405	0.16195	0.18985						0.18985
Squalius laietanus	T9	2012-06-04	152	57.5	3	1	4	6	7						7	0.0922	0.1759	0.2317	0.2596						0.2596
Squalius laietanus	T8	2012-06-05	113	21	2	1.5	3.5	4							4	0.10615	0.16195	0.1759							0.1759
Squalius laietanus	T8	2012-06-05	98	14.3	2	0.5	2	4							4	0.07825	0.1201	0.1759							0.1759
Squalius laietanus	T8	2012-06-05	101	14.1	2	0.5	2	3.5							3.5	0.07825	0.1201	0.16195							0.16195
Squalius laietanus	T8	2012-06-05	80	7.5	1	1	3								3	0.0922	0.148								0.148
Squalius laietanus	T8	2012-06-05	80	7.7	1	1.5	3								3	0.10615	0.148								0.148
Squalius laietanus	T8	2012-06-05	117	23.7	2	0.5	3	5							5	0.07825	0.148	0.2038							0.2038
Squalius laietanus	T8	2012-06-05	262	268.9	5	0.5	3.5	8	11	12.5	13				13	0.07825	0.16195	0.2875	0.3712	0.41305	0.427				0.427
Squalius laietanus	T8	2012-06-05	84	8.6	1	1	2.5								2.5	0.0922	0.13405								0.13405
Squalius laietanus	T8	2012-06-05	80	7.1	1	1.5	3								3	0.10615	0.148								0.148
Squalius laietanus	T8	2012-06-05	77	6.5	1	1	3								3	0.0922	0.148								0.148
Squalius laietanus	T8	2012-06-05	198	112.9	3	1	4	9	10						10	0.0922	0.1759	0.3154	0.3433						0.3433
Squalius laietanus	T8	2012-06-05	112	21.7	2	1.5	3	4							4	0.10615	0.148	0.1759							0.1759
Squalius laietanus	T8	2012-06-05	84	8.6	1	1.5	3								3	0.10615	0.148								0.148
Squalius laietanus	T9	2012-06-05	163	51.2	3	1	2	4	6						6	0.0922	0.1201	0.1759	0.2317						0.2317
Squalius laietanus	T9	2012-06-05	162	57.3	3	0.5	4	5	5.5						5.5	0.07825	0.1759	0.2038	0.21775						0.21775
Squalius laietanus	T9	2012-06-05	165	57.9	3	0.5	3.5	6	6.5						6.5	0.07825	0.16195	0.2317	0.24565						0.24565
Squalius laietanus	T9	2012-06-05	149	50.5	3	0.5	2.5	5	6						6	0.07825	0.13405	0.2038	0.2317						0.2317
Squalius laietanus	T9	2012-06-05	117	22	3	0.5	2	3.5	4						4	0.07825	0.1201	0.16195	0.1759						0.1759
Squalius laietanus	T9	2012-06-05	107	19.9	2	1	2.5	4							4	0.0922	0.13405	0.1759							0.1759
Squalius laietanus	T9	2012-06-05	120	26	2	1.5	3	5							5	0.10615	0.148	0.2038							0.2038
Squalius laietanus	T9	2012-06-05	107	19.6	2	0.5	2	3.5							3.5	0.07825	0.1201	0.16195							0.16195
Squalius laietanus	T9	2012-06-05	91	12.4	2	0.5	2	3							3	0.07825	0.1201	0.148							0.148
Squalius laietanus	T9	2012-06-05	76	6.4	1	1	2.5								2.5	0.0922	0.13405								0.13405
Squalius laietanus	T9	2012-06-05	88	9.9	1	1	2.5								2.5	0.0922	0.13405								0.13405
Squalius laietanus	T9	2012-06-05	74	6.1	1	1.5	2.5								2.5	0.10615	0.13405								0.13405
Squalius laietanus	T9	2012-06-05	76	7.1	1	1	2.5								2.5	0.0922	0.13405								0.13405
Squalius laietanus	T9	2012-06-05	74	6.5	1	1	2.5								2.5	0.0922	0.13405								0.13405
Squalius laietanus	T9	2012-06-05	78	7	1	1.5	3								3	0.10615	0.148								0.148
Squalius laietanus	T9	2012-06-05	75	6.7	1	1.5	3								3	0.10615	0.148								0.148
Squalius laietanus	T9	2012-06-05	163	74.8	3	0.5	3	5.5	6						6	0.07825	0.148	0.21775	0.2317						0.2317
Squalius laietanus	T9	2012-06-05	158	60.3	4	0.5	2	3.5	5	6					6	0.07825	0.1201	0.16195	0.2038	0.2317					0.2317
Squalius laietanus	T9	2012-06-05	97	13.3	4	0.5	3	4	5	6					6	0.07825	0.148	0.1759	0.2038	0.2317					0.2317
Squalius laietanus	T9	2012-06-05	111	19.8	3	2	4.5	5.5	6						6	0.1201	0.18985	0.21775	0.2317						0.2317
Squalius laietanus	T9	2012-06-05	94	12.4	2	1	2.5	3.5							3.5	0.0922	0.13405	0.16195							0.16195
Squalius laietanus	T9	2012-06-05	83	8.4	2	0.5	2.5	4							4	0.07825	0.13405	0.1759							0.1759
Squalius laietanus	T9	2012-06-05	86	10	2	0.5	2	3.5							3.5	0.07825	0.1201	0.16195							0.16195
Squalius laietanus	T9	2012-06-05	78	6.8	2	0.5	1.5	2.5							2.5	0.07825	0.10615	0.13405							0.13405
Squalius laietanus	T9	2012-06-05	84	8	1	1	2.5								2.5	0.0922	0.13405								0.13405
Squalius laietanus	T8	2012-10-02	219	133.3	4	1	3	4.5	6.5	9					9	0.0922	0.148	0.18985	0.24565	0.3154					0.3154
Squalius laietanus	T8	2012-10-02	222	153.8	4	0.5	2	5	6	8					8	0.07825	0.1201	0.2038	0.2317	0.2875					0.2875
Squalius laietanus	T8	2012-10-02	124	31.6	2	0.5	3	4.5							4.5	0.07825	0.148	0.18985							0.18985
Squalius laietanus	T8	2012-10-02	125	32	2	1	4.5	5							5	0.0922	0.18985	0.2038							0.2038
Squalius laietanus	T8	2012-10-02	93	11.4	1	1	3								3	0.0922	0.148								0.148
Squalius laietanus	T8	2012-10-02	94	10.9	1	0.5	3								3	0.07825	0.148								0.148
Squalius laietanus	T8	2012-10-02	110	16.7	2	0.5	2.5	3.5							3.5	0.07825	0.13405	0.16195							0.16195
Squalius laietanus	T9	2012-10-02	161	54.6	3	0.5	3	5	5.5						5.5	0.07825	0.148	0.2038	0.21775						0.21775
Squalius laietanus	T9	2012-10-02	197	104.5	4	0.5	1	3.5	4.5	6					6	0.07825	0.0922	0.16195	0.18985	0.2317					0.2317
Squalius laietanus	T9	2012-10-02	175	69.7	3	1	3	5	7						7	0.0922	0.148	0.2038	0.2596						0.2596
Squalius laietanus	T9	2012-10-02	106	14.7	2	1	2.5	3.5							3.5	0.0922	0.13405	0.16195							0.16195
Squalius laietanus	T9	2012-10-02	149	40.1	2	2	4	5							5	0.1201	0.1759	0.2038							0.2038
Squalius laietanus	T9	2012-10-02	117	20.1	2	0.5	2.5	3.5							3.5	0.07825	0.13405	0.16195							0.16195
Squalius laietanus	T9	2012-10-02	195	88.3	4	0.5	2.5	4	6	7.5					7.5	0.07825	0.13405	0.1759	0.2317	0.27355					0.27355
Squalius laietanus	T9	2012-10-02	162	54.1	4	0.5	2	3.5	4.5	6					6	0.07825	0.1201	0.16195	0.18985	0.2317					0.2317
Squalius laietanus	T9	2012-10-02	163	55.2	4	0.5	2	3	5	6					6	0.07825	0.1201	0.148	0.2038	0.2317					0.2317
Squalius laietanus	T9	2012-10-02	157	54.9	3	0.5	2.5	5	6						6	0.07825	0.13405	0.2038	0.2317						0.2317
Squalius laietanus	T9	2012-10-02	133	28	3	1	2	3.5	4.5						4.5	0.0922	0.1201	0.16195	0.18985						0.18985
Squalius laietanus	T9	2012-10-02	97	13.1	2	0.5	2	3							3	0.07825	0.1201	0.148							0.148
Squalius laietanus	T9	2012-10-02	171	61.6	3	0.5	4.5	5	6						6	0.07825	0.18985	0.2038	0.2317						0.2317
Squalius laietanus	T9	2012-10-02	95	11.3	1	1	2.5								2.5	0.0922	0.13405								0.13405
Squalius laietanus	T9	2012-10-02	106	14.9	1	1	3								3	0.0922	0.148								0.148
Squalius laietanus	T9	2012-10-02	114	20.8	2	1.5	3	4							4	0.10615	0.148	0.1759							0.1759
Squalius laietanus	T9	2012-10-02	99	13.6	2	1	3	4							4	0.0922	0.148	0.1759							0.1759
Squalius laietanus	T9	2012-10-02	79	6.7	2	0.5	1.5	3							3	0.07825	0.10615	0.148							0.148
Squalius laietanus	T9	2012-10-02	94	11.4	1	1.5	2								2	0.10615	0.1201								0.1201
Squalius laietanus	T9	2012-10-02	96	7.3	1	1	3								3	0.0922	0.148								0.148
Squalius laietanus	T9	2012-10-02	102	12.6	2	1	2.5	3							3	0.0922	0.13405	0.148							0.148
Squalius laietanus	T9	2012-10-02	103	15.6	1	2.5	3								3	0.13405	0.148								0.148
Squalius laietanus	T9	2012-10-02	102	11.5	2	0.5	2.5	3							3	0.07825	0.13405	0.148							0.148
Squalius laietanus	T9	2012-10-02	165	65.4	3	1	3	4.5	5.5						5.5	0.0922	0.148	0.18985	0.21775						0.21775
Squalius laietanus	T9	2012-10-02	202	110.8	5	0.5	1.5	3.5	5	7	8				8	0.07825	0.10615	0.16195	0.2038	0.2596	0.2875				0.2875
Squalius laietanus	T9	2012-10-02	84	8.9	1	2.5	6								6	0.13405	0.2317								0.2317
Squalius laietanus	T9	2012-10-02	88	9.7	1	2	2.5								2.5	0.1201	0.13405								0.13405
Squalius laietanus	T9	2012-10-02	87	8.8	2	0.5	2	2.5							2.5	0.07825	0.1201	0.13405							0.13405
Squalius laietanus	T9	2012-10-02	109	16.5	2	1	3	3.5							3.5	0.0922	0.148	0.16195							0.16195
Squalius laietanus	T9	2012-10-02	174	68.6	3	0.5	3	5	6						6	0.07825	0.148	0.2038	0.2317						0.2317
Squalius laietanus	T9	2012-10-02	156	45	3	1	2	3.5	5.5						5.5	0.0922	0.1201	0.16195	0.21775						0.21775
Squalius laietanus	T9	2012-10-02	184	78.8	4	1	3	4	5	6.5					6.5	0.0922	0.148	0.1759	0.2038	0.24565					0.24565
Squalius laietanus	T9	2012-10-02	168	58.8	3	1	2.5	4.5	6						6	0.0922	0.13405	0.18985	0.2317						0.2317
Squalius laietanus	T9	2012-10-02	208	118.1	4	0.5	2.5	4	5	6					6	0.07825	0.13405	0.1759	0.2038	0.2317					0.2317
Squalius laietanus	T9	2012-10-02	179	73.2	4	1	3.5	4.5	6.5	7.5					7.5	0.0922	0.16195	0.18985	0.24565	0.27355					0.27355
Squalius laietanus	T9	2012-10-02	194	95.3	3	1	4	6	8						8	0.0922	0.1759	0.2317	0.2875						0.2875
Squalius laietanus	T9	2012-10-02	190	94.2	4	1.5	3.5	5	8	9.5					9.5	0.10615	0.16195	0.2038	0.2875	0.32935					0.32935
Squalius laietanus	T9	2012-10-02	183	82.6	4	0.5	3	4.5	6	7					7	0.07825	0.148	0.18985	0.2317	0.2596					0.2596
Squalius laietanus	T9	2012-10-02	148	43.7	3	0.5	2	4.5	5						5	0.07825	0.1201	0.18985	0.2038						0.2038
Squalius laietanus	T1	2012-10-04	214	107.2	4	1	3	4.5	7	9					9	0.0922	0.148	0.18985	0.2596	0.3154					0.3154
Squalius laietanus	T8	2012-10-08	132	29	3	1	2.5	4.5	5						5	0.0922	0.13405	0.18985	0.2038						0.2038
Squalius laietanus	T9	2012-10-08	159	49.3	4	0.5	2	3	4.5	6					6	0.07825	0.1201	0.148	0.18985	0.2317					0.2317
Squalius laietanus	T9	2012-10-08	190	88.7	4	1	4	5.5	7.5	8.5					8.5	0.0922	0.1759	0.21775	0.27355	0.30145					0.30145
Squalius laietanus	T9	2012-10-08	189	94.7	4	0.5	3	5	7	7.5					7.5	0.07825	0.148	0.2038	0.2596	0.27355					0.27355
Squalius laietanus	T11	2013-10-09	189	91	3	2	6	8.5	9.5						9.5	0.1201	0.2317	0.30145	0.32935						0.32935
Squalius laietanus	T11	2013-10-09	151	45.5	4	0.5	3	4	5	6					6	0.07825	0.148	0.1759	0.2038	0.2317					0.2317
Squalius laietanus	T11	2013-10-09	174	77	3	1	1.5	3.5	7						7	0.0922	0.10615	0.16195	0.2596						0.2596
Squalius laietanus	T11	2013-10-09	152	46	4	0.5	2.5	3.5	4.5	6.5					6.5	0.07825	0.13405	0.16195	0.18985	0.24565					0.24565
Squalius laietanus	T11	2013-10-09	239	173.6	4	0.5	3.5	4.5	7	10					10	0.07825	0.16195	0.18985	0.2596	0.3433					0.3433
Squalius laietanus	T11	2013-10-09	166	56.5	5	0.5	3.5	5.5	7	8					8	0.07825	0.16195	0.21775	0.2596	0.2875					0.2875
Squalius laietanus	T11	2013-10-09	176	73.7	3	1	4	8	10						10	0.0922	0.1759	0.2875	0.3433						0.3433
Squalius laietanus	T11	2013-10-09	171	59.2	2	1	3	7							7	0.0922	0.148	0.2596							0.2596
Squalius laietanus	T11	2013-10-09	152	43.3	3	0.5	3	4.5	6						6	0.07825	0.148	0.18985	0.2317						0.2317
Squalius laietanus	T11	2013-10-09	157	49.1	3	1	3.5	5	6						6	0.0922	0.16195	0.2038	0.2317						0.2317
Squalius laietanus	T11	2013-10-09	162	59.2	3	1	2	5	7						7	0.0922	0.1201	0.2038	0.2596						0.2596
Squalius laietanus	T11	2013-10-09	116	14.8	2	0.5	3.5	4.5							4.5	0.07825	0.16195	0.18985							0.18985
Squalius laietanus	T11	2013-10-09	116	21	2	1	2	4.5							4.5	0.0922	0.1201	0.18985							0.18985
Squalius laietanus	T11	2013-10-09	240	184	5	0.5	1.5	2.5	5.5	10.5					10.5	0.07825	0.10615	0.13405	0.21775	0.35725					0.35725
Squalius laietanus	T11	2013-10-09	73	4.8	1	0.5	2								2	0.07825	0.1201								0.1201
Squalius laietanus	T11	2013-10-09	96	10.9	2	1	3	3.5							3.5	0.0922	0.148	0.16195							0.16195
Squalius laietanus	T11	2013-10-09	223	119	4	1	4	4.5	7	9.5					9.5	0.0922	0.1759	0.18985	0.2596	0.32935					0.32935
Squalius laietanus	T11	2013-10-09	93	8.8	2	0.5	1.5	3							3	0.07825	0.10615	0.148							0.148
Squalius laietanus	T11	2013-10-09	92	9.7	1	0.5	3.5								3.5	0.07825	0.16195								0.16195
Squalius laietanus	T11	2013-10-09	226	120	4	1	2	3.5	5.5	8					8	0.0922	0.1201	0.16195	0.21775	0.2875					0.2875
Squalius laietanus	T11	2013-10-09	222	141	3	1.5	4.5	7	10						10	0.10615	0.18985	0.2596	0.3433						0.3433
Squalius laietanus	T11	2013-10-09	222	148	3	1	3	6.5	9.5						9.5	0.0922	0.148	0.24565	0.32935						0.32935
Squalius laietanus	T11	2013-10-09	230	176	3	0.5	4	6	9						9	0.07825	0.1759	0.2317	0.3154						0.3154
Squalius laietanus	T11	2013-10-09	197	111.5	4	1	3.5	4.5	6.5	9					9	0.0922	0.16195	0.18985	0.24565	0.3154					0.3154
Squalius laietanus	T10	2013-10-11	148	36.7	3	0.5	2.5	4	5						5	0.07825	0.13405	0.1759	0.2038						0.2038
Squalius laietanus	T10	2013-10-11	156	49	3	0.5	3	4.5	6.5						6.5	0.07825	0.148	0.18985	0.24565						0.24565
Squalius laietanus	T10	2013-10-11	169	51	2	0.5	2.5	7.5							7.5	0.07825	0.13405	0.27355							0.27355
Squalius laietanus	T10	2013-10-11	140	36.7	2	0.5	2	6							6	0.07825	0.1201	0.2317							0.2317
Squalius laietanus	T10	2013-10-11	125	23.8	2	1	3	4.5							4.5	0.0922	0.148	0.18985							0.18985
Squalius laietanus	T10	2013-10-11	126	26.6	2	0.5	1.5	4.5							4.5	0.07825	0.10615	0.18985							0.18985
Squalius laietanus	T10	2013-10-11	146	44.5	3	1	3	5.5	6.5						6.5	0.0922	0.148	0.21775	0.24565						0.24565
Squalius laietanus	T10	2013-10-11	210	126	4	0.5	2.5	4	7	9.5					9.5	0.07825	0.13405	0.1759	0.2596	0.32935					0.32935
Squalius laietanus	T10	2013-10-11	93	9.5	2	0.5	2	3.5							3.5	0.07825	0.1201	0.16195							0.16195
Squalius laietanus	T10	2013-10-11	96	11.5	2	0.5	2.5	4							4	0.07825	0.13405	0.1759							0.1759
Squalius laietanus	T10	2013-10-11	145	38.3	2	0.5	2.5	6.5							6.5	0.07825	0.13405	0.24565							0.24565
Squalius laietanus	T10	2013-10-11	142	35.2	4	0.5	2	3	4.5	6					6	0.07825	0.1201	0.148	0.18985	0.2317					0.2317
Squalius laietanus	T10	2013-10-11	214	124.7	5	1	2	3.5	5	7	9				9	0.0922	0.1201	0.16195	0.2038	0.2596	0.3154				0.3154
Squalius laietanus	T10	2013-10-11	170	77.5	4	1	2.5	3.5	4.5	6.5					6.5	0.0922	0.13405	0.16195	0.18985	0.24565					0.24565
Squalius laietanus	T10	2013-10-11	168	69	4	0.5	2.5	3	5	7					7	0.07825	0.13405	0.148	0.2038	0.2596					0.2596
Squalius laietanus	T10	2013-10-11	163	53.8	2	1	3	7							7	0.0922	0.148	0.2596							0.2596
Squalius laietanus	T10	2013-10-11	310	491	6	1	3	5.5	8	11	13	16.5			16.5	0.0922	0.148	0.21775	0.2875	0.3712	0.427	0.52465			0.52465
Squalius laietanus	T10	2013-10-11	298	370	6	1.5	3.5	5	8	11	13	15.5			15.5	0.10615	0.16195	0.2038	0.2875	0.3712	0.427	0.49675			0.49675
Squalius laietanus	T10	2013-10-11	262	245	6	0.5	3.5	4.5	7	9.5	11	13.5			13.5	0.07825	0.16195	0.18985	0.2596	0.32935	0.3712	0.44095			0.44095
Squalius laietanus	T9	2013-10-11	228	225	6	1.5	4	6	7.5	9.5	12.5				12.5	0.10615	0.1759	0.2317	0.27355	0.32935	0.41305				0.41305
Squalius laietanus	T9	2013-10-11	232	176.6	7	1	3	4.5	8	8.5	11	12.5			12.5	0.0922	0.148	0.18985	0.2875	0.30145	0.3712	0.41305			0.41305
Squalius laietanus	T9	2013-10-11	234	175	6	0.5	3	3.5	6	7	9.5	11.5			11.5	0.07825	0.148	0.16195	0.2317	0.2596	0.32935	0.38515			0.38515
Squalius laietanus	T9	2013-10-11	206	133.3	5	1.5	3	4	8	9	11				11	0.10615	0.148	0.1759	0.2875	0.3154	0.3712				0.3712
Squalius laietanus	T9	2013-10-11	134	36	3	0.5	2.5	4.5	6						6	0.07825	0.13405	0.18985	0.2317						0.2317
Squalius laietanus	T9	2013-10-11	178	72.8	5	0.5	2.5	3.5	7	8					8	0.07825	0.13405	0.16195	0.2596	0.2875					0.2875
Squalius laietanus	T9	2013-10-11	162	59	4	1	3	5	7	8					8	0.0922	0.148	0.2038	0.2596	0.2875					0.2875
Squalius laietanus	T9	2013-10-11	177	81.2	4	1	4	5	8	9.5					9.5	0.0922	0.1759	0.2038	0.2875	0.32935					0.32935
Squalius laietanus	T9	2013-10-11	102	10.1	2	1	2	3							3	0.0922	0.1201	0.148							0.148
Squalius laietanus	T9	2013-10-11	97	12.8	1	1	3.5								3.5	0.0922	0.16195								0.16195
Squalius laietanus	T9	2013-10-11	92	11.8	1	0.5	3.5								3.5	0.07825	0.16195								0.16195
Squalius laietanus	T9	2013-10-11	187	83.4	4	0.5	3	4.5	7.5	9					9	0.07825	0.148	0.18985	0.27355	0.3154					0.3154
Squalius laietanus	T9	2013-10-11	198	98	5	0.5	2	3	4.5	8	9.5				9.5	0.07825	0.1201	0.148	0.18985	0.2875	0.32935				0.32935
Squalius laietanus	T9	2013-10-11	297	333.9	7	1	2.5	5	7	9	11	13	15		15	0.0922	0.13405	0.2038	0.2596	0.3154	0.3712	0.427	0.4828		0.4828
Squalius laietanus	T9	2013-10-11	197	106.8	4	1	3	6	7.5	9					9	0.0922	0.148	0.2317	0.27355	0.3154					0.3154
Squalius laietanus	T9	2013-10-11	139	34.9	2	0.5	2	6.5							6.5	0.07825	0.1201	0.24565							0.24565
Squalius laietanus	T9	2013-10-11	164	62.5	4	1	2	4	5	8.5					8.5	0.0922	0.1201	0.1759	0.2038	0.30145					0.30145
Squalius laietanus	T9	2013-10-11	190	88.3	4	0.5	1.5	4	6.5	9					9	0.07825	0.10615	0.1759	0.24565	0.3154					0.3154
Squalius laietanus	T9	2013-10-11	154	48.9	3	1	3	5.5	6.5						6.5	0.0922	0.148	0.21775	0.24565						0.24565
Squalius laietanus	T9	2013-10-11	180	73.2	5	1	2	4	6	6.5	7.5				7.5	0.0922	0.1201	0.1759	0.2317	0.24565	0.27355				0.27355
Squalius laietanus	T9	2013-10-11	168	60.4	4	1	3	5	6.5	7					7	0.0922	0.148	0.2038	0.24565	0.2596					0.2596
Squalius laietanus	T9	2013-10-11	137	35.9	3	0.5	2.5	5.5	6.5						6.5	0.07825	0.13405	0.21775	0.24565						0.24565
Squalius laietanus	T9	2013-10-11	130	28.8	3	1	3	3.5	8.5						8.5	0.0922	0.148	0.16195	0.30145						0.30145
Squalius laietanus	T9	2013-10-11	162	59.2	4	1	3.5	6	7	7.5					7.5	0.0922	0.16195	0.2317	0.2596	0.27355					0.27355
Squalius laietanus	T9	2013-10-11	123	25.9	3	1.5	3	5	6						6	0.10615	0.148	0.2038	0.2317						0.2317
Squalius laietanus	T9	2013-10-11	174	64.3	4	1.5	3.5	6	8	8.5					8.5	0.10615	0.16195	0.2317	0.2875	0.30145					0.30145
Squalius laietanus	T9	2013-10-11	142	34.9	3	1.5	2	5	6						6	0.10615	0.1201	0.2038	0.2317						0.2317
Squalius laietanus	T12	2013-10-09	130	26.3	3	1	2	4	5						5	0.0922	0.1201	0.1759	0.2038						0.2038
Squalius laietanus	T12	2013-10-09	58	3.5	0	1.5									1.5	0.10615									0.10615
Squalius laietanus	T12	2013-10-09	158		4	1	2	4	6	7.5					7.5	0.0922	0.1201	0.1759	0.2317	0.27355					0.27355
Squalius laietanus	T12	2013-10-09	57		0	1									1	0.0922									0.0922

## Sheet: Microfiche scale
October 2013
Id	mm (screen)	mm (real)
TO3	199	5.64
CR12	108	3.11
AF11	183	5.15
AF15	191	5.46
AF18	170	4.78
AF20	142	4.09
AF30	28	0.9
AF47	64	1.85
AF48	82	2.32
GR1	114	3.14
